# Supplementary material for: Lesbian, gay, bisexual, and transgender (LGBT) health services in the United States: Origins, evolution, and contemporary landscape
Source: PLoS One. 2017 Jul 10;12(7):e0180544. doi: 10.1371/journal.pone.0180544 (PMC5503273; doi:10.1371/journal.pone.0180544)
Supplement: S1 File — (XLSX) [file pone.0180544.s001.xlsx]

## Sheet: Data Sheet
ID	Center Name	ServeLesbian	ServeGay	ServeBisexual	ServeTransgender	GeoCoverage	WebPresence	WebAddress	NGOStatus	InOperation	SiteType	OrgType	PhisicalSpace	SpaceType	Street Address	City	State	Zip	SHServices	HealthScreenings	CTServices	SupportServices	BlackSpecific	LatinoSpecific	APISpecific	MaleSpecific	FemaleSpecific	GenerationSpecific	Source	CommunityCenter	CommHealthCenter
1	Affirmations	1	1	1	1	2	1	http://www.goaffirmations.org/	1	1	1	0	1	1	290 West Nine Mile Road	Ferndale	Michigan	48220	1	1	1	1	0	0	0	0	0	0	1	1	1
2	BAGLY, Inc. (Boston Alliance of LGBTQ Youth)	1	1	1	1	2	1	http://www.bagly.org/	1	1	2	0	1	2	565 Boylston Street	Boston	Massachusetts	2116	0	1	1	0	0	0	0	0	0	1	1	1	1
3	BAGLY, Inc. (Boston Alliance of LGBTQ Youth) - The Clinic @ BAGLY	1	1	1	1	2	1	http://www.bagly.org/	1	1	2	0	1	2	14 Beacon Street	Boston	Massachusetts	2108	1	1	1	0	0	1	0	0	0	1	1	1	1
4	Bienestar Human Services, Inc. - Coachella	1	1	1	1	2	1	http://www.bienestar.org/	1	1	2	0	1	1	53-990 Enterprise Way	Coachella	California	92236	1	1	1	1	0	1	0	0	0	0	1	1	1
5	Bienestar Human Services, Inc. - El Monte	1	1	1	1	2	1	http://www.bienestar.org/	1	1	2	0	1	1	3131 Santa Anita Avenue	El Monte	California	91733	1	1	1	1	0	1	0	0	0	0	1	1	1
6	Bienestar Human Services, Inc. - Long Beach	1	1	1	1	2	1	http://www.bienestar.org/	1	1	2	0	1	1	1464 Cherry Avenue	Long Beach	California	90813	1	1	1	1	0	1	0	0	0	0	1	1	1
7	Bienestar Human Services, Inc. - South Los Angeles	1	1	1	1	2	1	http://www.bienestar.org/	1	1	2	0	1	1	130 West Manchester Avenue	Los Angeles	California	90003	1	1	1	1	0	1	0	0	0	0	1	1	1
8	Bienestar Human Services, Inc. - East Los Angeles	1	1	1	1	2	1	http://www.bienestar.org/	1	1	2	0	1	1	5326 East Beverly Boulevard	Los Angeles	California	90022	1	1	1	1	0	1	0	0	0	0	1	1	1
9	Bienestar Human Services, Inc. - Hollywood	1	1	1	1	2	1	http://www.bienestar.org/	1	1	2	0	1	1	4955 West Sunset Boulevard	Los Angeles	California	90027	1	1	1	1	0	1	0	0	0	0	1	1	1
10	Bienestar Human Services, Inc. - Pomona	1	1	1	1	2	1	http://www.bienestar.org/	1	1	2	0	1	1	180 East Mission Boulevard	Pomona	California	91766	1	1	1	1	0	1	0	0	0	0	1	1	1
11	Bienestar Human Services, Inc. - San Fernando Valley	1	1	1	1	2	1	http://www.bienestar.org/	1	1	2	0	1	1	8134 Van Nuys Boulevard	Panorama City	California	91492	1	1	1	1	0	1	0	0	0	0	1	1	1
12	Billy DeFrank LGBT Community Center	1	1	1	1	2	1	http://www.defrankcenter.org/	1	1	1	0	1	1	938 The Alameda	San Jose	California	95126	0	1	0	1	0	0	0	0	0	0	1	1	1
13	Brooklyn Community Pride Center	1	1	1	1	2	1	http://www.lgbtbrooklyn.org/	1	1	1	0	1	1	4 Metrotech	Brooklyn	New York	11201	0	1	0	1	0	0	0	0	0	0	1	1	1
14	Center on Halsted	1	1	1	1	2	1	http://www.centeronhalsted.org/	1	1	1	0	1	1	3656 North Halsted Street	Chicago	Illinois	60613	1	1	1	1	0	0	0	0	0	0	1	1	1
15	Compass Community Center	1	1	1	1	2	1	http://www.compassglcc.com/	1	1	1	0	1	1	201 North Dixie Highway	Lake Worth	Florida	33460	1	1	1	1	0	0	0	0	0	0	1	1	1
16	Oklahomans for Equality - Dennis R Neill Equality Center	1	1	1	1	1	1	http://www.okeq.org/	1	1	1	0	1	1	621 East 4th Street	Tulsa	Oklahoma	74120	0	1	1	1	0	0	0	0	0	0	1	1	1
17	Gay & Lesbian Service Organization Pride Center	1	1	1	1	2	1	http://www.glso.org/site/	1	1	1	0	1	1	389 Waller Avenue	Lexington	Kentucky	40504	0	0	1	1	0	0	0	0	0	0	1	1	1
18	Gay & Lesbian Youth Services of Western New York, Inc.	1	1	1	1	2	1	http://www.glyswny.org/	1	1	1	0	1	1	371 Delaware Avenue	Buffalo	New York	14202	0	0	0	0	0	0	0	0	0	1	1	1	0
19	Gay and Lesbian Community Center of Pittsburgh	1	1	1	1	2	1	http://www.glccpgh.org/	1	1	1	0	1	1	210 Grant Street	Pittsburgh	Pennsylvania	15219	1	1	1	0	0	0	0	0	0	0	1	1	1
20	Hudson Pride Connections Center	1	1	1	1	2	1	http://hudsonpride.org/	1	1	1	0	1	1	32 Jones Street	Jersey City	New Jersey	7306	0	0	0	1	0	0	0	0	0	0	1	1	1
21	Hudson Pride Foundation	1	1	1	1	2	1	http://www.hudsonpridefoundation.org/	1	1	0	0	0	0	9999	Hudson	New York	9999	0	0	0	0	0	0	0	0	0	0	1	0	0
22	Hudson Valley LGBTQ Community Center	1	1	1	1	2	1	http://lgbtqcenter.org/	1	1	1	0	1	1	300 Wall Street	Kingston	New York	12401	0	0	0	0	0	0	0	0	0	0	1	1	0
23	In Our Own Voices	1	1	1	1	2	1	http://www.inourownvoices.org/	1	1	1	0	1	1	245 Lark Street	Albany	New York	12210	1	1	0	1	1	1	1	0	0	0	1	1	1
24	Indiana Youth Group	1	1	1	1	2	1	http://www.indianayouthgroup.org/	1	1	1	0	1	1	2943 East 46th Street	Indianapolis	Indiana	46205	1	0	0	1	0	0	0	0	0	1	1	1	1
25	Inside Out Youth Services	1	1	1	1	2	1	https://www.insideoutys.org/	1	1	1	0	1	1	412 South Tejon Street	Colorado Springs	Colorado	80903	0	0	0	0	0	0	0	0	0	1	1	1	0
26	Jacksonville Area Sexual Minority Youth Network, Inc. (JASMYN)	1	1	1	1	2	1	http://jasmyn.org/	1	1	1	0	1	1	923 Peninsular Place	Jacksonville	Florida	32204	1	1	1	1	0	0	0	0	0	1	1	1	1
27	Los Angeles LGBT Center - Mi Centro	1	1	1	1	2	1	http://www.lalgbtcenter.org	1	1	2	0	1	1	553 South Clarence Street	Los Angeles	California	90033	1	0	0	1	0	1	0	0	0	0	1	1	1
28	Los Angeles LGBT Center - Highland Annex	1	1	1	1	2	1	http://www.lalgbtcenter.org	1	1	2	0	1	1	1220 North Highland Avenue	Los Angeles	California	90038	0	1	1	0	0	0	0	0	0	1	1	1	1
29	Los Angeles LGBT Center - WeHo	1	1	1	1	2	1	http://www.lalgbtcenter.org	1	1	2	0	1	1	8745 Santa Monica Boulevard	West Hollywood	California	90069	1	1	0	0	0	0	0	0	0	0	1	1	1
30	Los Angeles LGBT Center - McDonald/Wright Building	1	1	1	1	2	1	http://www.lalgbtcenter.org	1	1	2	0	1	1	1625 N. Schrader Boulevard	Los Angeles	California	90028	0	0	0	1	0	0	0	0	0	0	1	1	1
31	Los Angeles LGBT Center - The Village at Ed Gould Plaza	1	1	1	1	2	1	http://www.lalgbtcenter.org	1	1	2	0	1	1	1125 North McCadden Place	Los Angeles	California	90038	1	1	1	0	0	0	0	0	0	0	1	1	1
32	Like Me Organization - LIKEME Lighthouse	1	1	1	1	2	1	http://www.likemelighthouse.org/	1	1	1	0	1	1	3911 Main Street	Kansas City	Missouri	64111	0	0	1	0	0	0	0	0	0	0	1	1	1
33	Q Center - Queens LGBT Community Center	1	1	1	1	2	1	http://lgbtnetwork.org/	0	1	1	0	1	1	58-20 Little Neck Parkway	Little Neck	New York	11362	0	0	0	0	0	0	0	0	0	0	1	0	0
34	LIGALY - Long Island LGBT Community Center	1	1	1	1	2	1	http://lgbtnetwork.org/	1	1	2	0	1	1	20 Crossways Park Drive North	Woodbury	New York	11797	1	1	1	1	0	0	0	0	0	0	1	1	1
35	LIGALY - The Center at Bay Shore	1	1	1	1	2	1	http://lgbtnetwork.org/	1	1	2	0	1	1	34 Park Avenue	Bay Shore	New York	11706	1	1	1	1	0	0	0	0	0	0	1	1	1
36	LIGALY - The Hamptons LGBT Center	1	1	1	1	2	1	http://lgbtnetwork.org/	1	1	2	0	1	1	44 Union Street	Sag Harbor	New York	11963	1	0	0	1	0	0	0	0	0	0	1	1	1
37	Memphis Gay and Lesbian Community Center	1	1	1	1	2	1	http://mglcc.org/	1	1	1	0	1	1	892 South Cooper Street	Memphis	Tennessee	38104	0	1	0	1	0	0	0	0	0	0	1	1	1
38	Metro Wellness & Community Center - St. Petersburg	1	1	1	1	2	1	www.metrotampabay.org	1	1	2	0	1	1	3251 3rd Avenue North	St. Petersburg	Florida	33713	1	1	1	1	0	0	0	0	0	0	1	1	1
39	Metro Wellness & Community Center - Tampa	1	1	1	1	2	1	www.metrotampabay.org	1	1	2	0	1	1	1315 East 7th Avenue	Tampa	Florida	33605	1	1	1	1	0	0	0	0	0	0	1	1	1
40	Metro Wellness & Community Center - New Port Richey	1	1	1	1	2	1	www.metrotampabay.org	1	1	2	0	1	1	4747 US Highway 19	New Port Richey	Florida	34652	1	1	1	1	0	0	0	0	0	0	1	1	1
41	Milwaukee LGBT Community Center	1	1	1	1	2	1	http://www.mkelgbt.org/	0	1	1	0	1	1	1110 North Market Street	Milwaukee	Wisconsin	53202	0	0	0	1	0	0	0	0	0	0	1	0	0
42	North County LGBTQ Resource Center	1	1	1	1	2	1	http://www.ncresourcecenter.org/	1	1	1	0	1	1	510 North Coast Highway	Oceanside	California	92054	1	1	1	1	0	0	0	0	0	0	1	1	1
43	NWA Center for Equality	1	1	1	1	2	1	http://nwaequality.org/	0	1	1	0	1	1	179 North Church Avenue	Fayetteville	Arkansas	72701	0	0	0	0	0	0	0	0	0	0	1	0	0
44	Oasis Youth Center	1	1	1	1	2	1	http://www.oasisyouthcenter.org/	1	1	1	1	1	2	2215 Pacific Avenue	Tacoma	Washington	98402	1	1	0	0	0	0	0	0	0	1	1	1	1
45	Free2Be LGBTQ Resource Center	1	1	1	1	2	1	http://free2be.org/	1	1	1	0	1	1	2004 Poole Drive	Huntsville	Alabama	35801	0	0	1	0	0	0	0	0	0	1	1	1	1
46	OutCenter	1	1	1	1	2	1	http://www.outcenter.org/	1	1	1	0	1	1	132 Water Street	Benton Harbor	Michigan	49022	0	0	1	1	0	0	0	0	0	0	1	1	1
47	Outright Vermont	1	1	1	1	1	1	http://www.outrightvt.org/	1	1	1	0	1	1	241 North Winooski Avenue	Burlington	Vermont	5401	1	1	0	0	0	0	0	0	0	1	1	1	1
48	pacific center for human growth	1	1	1	1	2	1	http://pacificcenter.org/	1	1	1	0	1	1	2712 Telegraph Avenue	Berkeley	California	94705	0	0	1	1	0	0	0	0	0	0	1	1	1
49	Pride Center of the Capital Region	1	1	1	1	2	1	http://www.capitalpridecenter.org/	1	1	1	0	1	1	332 Hudson Avenue	Albany	New York	12210	0	0	0	1	0	0	0	0	0	0	1	1	1
50	Q Center	1	1	1	1	2	1	http://www.pdxqcenter.org/	1	1	1	0	1	1	4115 Mississippi Avenue	Portland	Oregon	97217	0	0	0	1	0	0	0	0	0	0	1	1	1
51	Rainbow Serenity	1	1	1	1	2	1	http://www.rainbowserenity.org/	1	1	0	0	0	0	9999	Chicago	Illinois	9999	0	0	0	0	0	0	0	0	0	0	1	0	0
52	Resource Center Dallas - John Thomas LGBT Community Center	1	1	1	1	2	1	www.rcdallas.org	1	1	2	0	1	1	2701 Reagan Street	Dallas	Texas	75219	0	0	1	0	0	0	0	0	0	0	1	1	1
53	Resource Center Dallas - ilume	1	1	1	0	2	1	www.rcdallas.org	1	1	2	0	1	1	4123 Cedar Springs Road	Dallas	Texas	75219	1	0	0	1	0	0	0	0	0	0	1	1	1
54	Resource Center Dallas - Nelson Tebedo Clinic	1	1	1	1	2	1	www.rcdallas.org	1	1	2	0	1	1	4012 Cedar Springs Road	Dallas	Texas	75219	1	1	0	1	0	0	0	0	0	0	1	1	1
55	Resource Center Dallas - Nutrition Center/Food Pantry	1	1	1	1	2	1	www.rcdallas.org	1	1	2	0	1	1	5450 Denton Crive Cut Off	Dallas	Texas	75235	0	0	0	0	0	0	0	0	0	0	1	1	0
56	Resource Center Dallas - Fuse	0	1	1	0	2	1	www.rcdallas.org	1	1	2	0	1	1	4038 Lemmon Avenue	Dallas	Texas	75219	1	1	0	0	0	0	0	1	0	1	1	1	1
57	Resource Center Dallas - United Black Ellument	0	1	1	0	2	1	www.rcdallas.org	1	1	2	0	1	1	3116 Commerce Street	Dallas	Texas	75226	1	1	0	0	1	0	0	1	0	1	1	1	1
58	Resource Center Dallas - Youth First	1	1	1	1	2	1	www.rcdallas.org	1	1	2	0	1	1	3918 Harry Hines Boulevard	Dallas	Texas	75219	1	0	0	0	0	0	0	0	0	1	1	1	1
59	Pride Center of Vermont	1	1	1	1	1	1	http://www.pridecentervt.org/	1	1	1	0	1	1	255 South Champlain Street	Burlington	Vermont	5401	0	1	0	1	0	0	0	0	0	0	1	1	1
60	Ruth Ellis Center, Inc.	1	1	1	1	2	1	http://www.ruthelliscenter.org/	1	1	1	0	1	1	77 Victor Street	Highland Park	Michigan	48203	1	1	1	1	0	0	0	0	0	1	1	1	1
61	San Diego LGBT Community Center	1	1	1	1	2	1	http://www.thecentersd.org/	1	1	1	0	1	1	3909 Centre Street	San Diego	California	92103	1	1	1	1	0	0	0	0	0	0	1	1	1
62	SMYAL	1	1	1	1	2	1	http://www.smyal.org/	1	1	1	0	1	1	410 7th Street, SE	Washington	District of Columbia	20003	1	0	0	1	0	0	0	0	0	1	1	1	1
63	Staten Island LGBT Community Center	1	1	1	1	2	1	http://www.pridecentersi.org/	1	1	1	0	1	1	25 Victory Boulevard	Saten Island	New York	10301	1	1	1	1	0	0	0	0	0	0	1	1	1
64	Stonewall Alliance of Chico	1	1	1	1	2	1	http://www.stonewallchico.org/	1	1	1	0	1	1	358 East 6th Street	Chico	California	95927	0	1	1	1	0	0	0	0	0	0	1	1	1
65	SunServe	1	1	1	1	2	1	http://www.sunserve.org/	1	1	1	0	1	1	3212 Wilton Drive	Wilton Manors	Florida	33305	0	0	1	1	0	0	0	0	0	0	1	1	1
66	The [LGBTQ] Center of the Finger Lakes	1	1	1	1	2	1	http://thecenterfl.wix.com/lgbtq	0	1	1	0	1	1	671 South Exchange Street	Geneva	New York	14456	0	0	0	0	0	0	0	0	0	0	1	0	0
67	The Alliance for GLBTQ Youth	1	1	1	1	2	1	http://www.glbtqalliance.com/	1	1	1	0	1	1	1175 Northeast 125th Street	North Miami	Florida	33161	0	0	1	0	0	0	0	0	0	1	1	1	1
68	The Attic Youth Center	1	1	1	1	2	1	https://www.atticyouthcenter.org/	1	1	1	0	1	1	255 South 16th Street	Philadelphia	Pennsylvania	19102	1	0	1	1	0	0	0	0	0	1	1	1	1
69	The Family Tree Community Center, Inc.	1	1	1	1	2	1	http://www.familytreecenter.org/	1	1	1	0	1	1	2415 North Monroe Street	Tallahassee	Florida	32303	0	0	0	1	0	0	0	0	0	0	1	1	1
70	The Frederick Center	1	1	1	1	2	1	http://www.thefrederickcenter.org/	1	1	0	0	0	0	9999	Frederick	Maryland	9999	0	0	0	1	0	0	0	0	0	0	1	0	0
71	The Gay and Lesbian Services Center of Orange County	1	1	1	1	2	1	http://www.lgbtcenteroc.org/	1	1	1	0	1	1	1605 North Spurgeon Street	Santa Ana	California	92701	1	1	1	0	0	0	0	0	0	0	1	1	1
72	The GLBT Community Center of Central Florida / The Center Orlando	1	1	1	1	2	1	http://www.thecenterorlando.org/	1	1	1	0	1	1	946 North Mills Avenue	Orlando	Florida	32803	0	1	0	1	0	0	0	0	0	0	1	1	1
73	The GLBT Community Center of Colorado	1	1	1	1	2	1	http://www.glbtcolorado.org/	1	1	1	0	1	1	1301 East Colfax Avenue	Denver	Colorado	80218	0	1	0	1	0	0	0	0	0	0	1	1	1
74	The Lesbian, Gay, Bisexual and Transgender Community Center (NYC)	1	1	1	1	2	1	https://www.gaycenter.org	1	1	1	0	1	1	208 West 13th Street	New York	New York	10011	1	1	1	1	0	0	0	0	0	0	1	1	1
75	The LGBTQ Center of Long Beach	1	1	1	1	2	1	www.centerlb.org	1	1	1	0	1	1	2017 East 4th Street	Long Beach	California	90814	1	1	1	1	0	0	0	0	0	0	1	1	1
76	The Montrose Center	1	1	1	1	2	1	http://www.montrosecenter.org/hub/	1	1	1	0	1	1	401 Branard Street	Houston	Texas	77006	1	0	1	1	0	0	0	0	0	0	1	1	1
77	The Pride Center at Equality Park	1	1	1	1	2	1	http://www.pridecenterflorida.org/	1	1	1	0	1	1	2040 North Dixie Highway	Wilton Manors	Florida	33305	0	1	0	1	0	0	0	0	0	0	1	1	1
78	Time Out Youth Center	1	1	1	1	2	1	http://www.timeoutyouth.org/	1	1	1	0	1	1	2320 North Davidson Street	Charlotte	North Carolina	28205	0	0	1	1	0	0	0	0	0	1	1	1	1
79	Transgender Resource Center of New Mexico	0	0	0	1	1	1	http://www.tgrcnm.org/	1	1	1	0	1	1	149 Jackson Street Northeast	Albuquerque	New Mexico	87108	0	1	1	1	0	0	0	0	0	0	1	1	1
80	Utah Pride Center	1	1	1	1	1	1	http://www.utahpridecenter.org/	1	1	1	0	1	1	255 East 400 South	Salt Lake City	Utah	84111	0	1	1	1	0	0	0	0	0	0	1	1	1
81	William Way LGBT Community Center	1	1	1	1	2	1	http://www.waygay.org/	1	1	1	0	1	1	1315 Spruce Street	Philadelphia	Pennsylvania	19107	0	0	0	1	0	0	0	0	0	0	1	1	1
82	Wingspan	1	1	1	1	2	1		1	0	1	0	1	1	375 South Euclid Street	Tuscon	Arizona	85719	1	1	1	1	0	0	0	0	0	0	1	0	0
83	Callen-Lorde Seventeen: The Thea Spyer Center for Integrated Health	1	1	1	1	2	1	https://www.callen-lorde.org	1	1	2	0	1	1	230 West 17th Street	New York	New York	10011	1	1	1	1	0	0	0	0	0	0	2	1	1
84	Callen-Lorde Community Health Center	1	1	1	1	2	1	https://www.callen-lorde.org	1	1	2	0	1	1	356 West 18th Street	New York	New York	10011	1	1	1	1	0	0	0	0	0	0	2	1	1
85	Affinity Community Services	1	1	1	1	2	1	http://www.affinity95.org/	1	1	1	0	1	1	1424-28 East 53rd Street	Chicago	Illinois	60615	0	1	0	1	1	0	0	0	0	1	3	1	1
86	All Under One Roof	1	1	1	1	2	1	http://www.allunderoneroof.org/	1	1	1	0	1	2	234 North Main Street	Pocatello	Idaho	83201	0	1	0	1	0	0	0	0	0	1	3	1	1
87	ALSO Youth	1	1	1	1	2	1	http://www.alsoyouth.org/	1	1	1	0	1	1	1470 Boulevard of the Arts	Sarasota	Florida	34236	0	0	0	0	0	0	0	0	0	1	3	1	0
88	Bakersfield LGBTQ	1	1	1	1	2	1	http://www.bakersfieldpride.org/1.html	1	1	0	0	0	0	9999	Bakersfield	California	9999	0	0	0	0	0	0	0	0	0	0	3	0	0
89	Bradbury Sullivan LGBT Community Center	1	1	1	1	2	1	http://www.bradburysullivancenter.org/	1	0	0	0	0	0	9999	Bethlehem	Pennsylvania	9999	0	0	0	0	0	0	0	0	0	0	3	0	0
90	Build Our Center, Inc.	1	1	1	1	2	1	http://buildourcenter.org/	1	1	0	0	0	0	9999	Reno	Nevada	9999	0	0	0	0	0	0	0	0	0	0	3	0	0
91	Camp Rehoboth	1	1	0	0	2	1	http://www.camprehoboth.com/	1	1	1	0	1	1	37 Baltimore Avenue	Rehoboth Beach	Delaware	19971	0	0	0	1	0	0	0	0	0	0	3	1	1
92	Casa Ruby	1	1	1	1	2	1	http://www.casaruby.org/	1	1	1	0	1	1	2822 Georgia Avenue Northwest	Washington	District of Columbia	20001	0	0	0	1	0	1	0	0	0	0	3	1	1
93	Cascades Rainbow Community Center	1	1	1	1	2	1	http://cascaderainbow.org/	0	1	1	0	1	1	1508 North 18th Street	Mt. Vernon	Washington	98273	0	0	0	0	0	0	0	0	0	0	3	0	0
94	The Centers at CAR	1	1	1	1	1	1	http://www.car4ar.org/	0	1	1	0	1	2	800 Scott Street	Little Rock	Arkansas	72201	0	0	0	0	0	0	0	0	0	1	3	0	0
95	Center for Equality	1	1	1	1	2	1	http://thecenterforequality.org/	1	1	1	0	1	2	220 South Phillips Avenue	Souix Falls	South Dakota	57104	0	0	0	0	0	0	0	0	0	0	3	1	0
96	Colorado Springs Queer Collective	1	1	1	1	2	1	http://csqueercollective.org/	0	1	0	0	0	0	9999	Colorado Springs	Colorado	9999	0	0	0	0	0	0	0	0	0	0	3	0	0
97	Destination Tomorrow	1	1	1	1	2	1	http://destinationtomorrow.org/	1	1	1	0	1	1	1231 Lafayette Street	Bronx	New York	10474	0	0	0	1	0	0	0	0	0	1	3	1	1
98	Focus on Awareness and Information Resources of New York, Inc. (FAIRNY)	1	1	1	1	1	1	http://www.fairny.org/	0	1	0	1	0	0	9999	Dewitt	New York	9999	0	0	0	0	0	0	0	0	0	0	3	0	0
99	Gay & Lesbian Community Center of Southern Nevada	1	1	1	1	2	1	http://www.thecenterlv.org/	1	1	1	0	1	1	401 South Maryland Parkway	Las Vegas	Nevada	89101	1	1	0	1	0	0	0	0	0	0	3	1	1
100	Gay Alliance of the Genesee Valley	1	1	1	1	2	1	http://www.gayalliance.org/	1	1	1	0	1	1	875 East Main Street	Rochester	New York	14605	0	0	0	0	0	0	0	0	0	0	3	1	0
101	Gay, Lesbian, Bisexual, & Transgender Community Center of Baltimore	1	1	1	1	2	1	http://www.glccb.org/	1	1	1	0	1	1	1000 Cathedral Street	Baltimore	Maryland	21201	0	1	0	1	0	0	0	0	0	0	3	1	1
102	Gender Expansion Project	0	0	0	1	2	1	http://genderexpansionproject.org/	0	1	1	0	1	1	121 North Higgins Avenue	Missoula	Montana	59801	0	0	0	0	0	0	0	0	0	0	3	0	0
103	GLBT Resource Center of Michiana, Inc.	1	1	1	1	2	1	http://www.michianaglbtcenter.org/	1	1	1	0	1	1	1522 East Mishawaka Avenue	South Bend	Indiana	46615	0	0	0	0	0	0	0	0	0	0	3	1	0
104	Harlem Pride	1	1	1	1	2	1	https://harlempride.org	1	1	1	0	1	1	42 Macombs Place	New York	New York	10039	0	0	0	0	0	0	0	0	0	0	3	1	0
105	Harriet Hancock LGBT Center	1	1	1	1	2	1	http://lgbtcentersc.org/	1	1	1	0	1	1	1108 Woodrow Street	Columbia	South Carolina	29205	0	0	0	1	0	0	0	0	0	0	3	1	1
106	Hawaii LGBT Legacy Foundation	1	1	1	1	1	1	http://hawaiilgbtlegacyfoundation.com/	1	1	0	0	0	0	9999	Honolulu	Hawaii	9999	0	0	0	0	0	0	0	0	0	0	3	0	0
107	Identity, Inc - Gay & Lesbian Community Center of Anchorage	1	1	1	1	2	1	http://www.identityinc.org/	1	1	1	0	1	1	336 East 5th Avenue	Anchorage	Alaska	99501	0	0	0	0	0	0	0	0	0	0	3	1	0
108	Jim Toy Community Center	1	1	1	1	2	1	http://jimtoycenter.org/	1	1	1	0	1	1	319 Braun Court	Ann Arbor	Michigan	48104	0	0	0	1	0	0	0	0	0	0	3	1	1
109	Kalamazoo Gay Lesbian Resource Center	1	1	1	1	2	1	http://www.kglrc.org/	1	1	1	0	1	1	629 Pioneer Street	Kalamazoo	Michigan	49008	0	0	0	1	0	0	0	0	0	0	3	1	1
110	Kaleidoscope Youth Center	1	1	1	1	2	1	http://www.kycohio.org/	1	1	1	0	1	1	1904 North High Street	Columbus	Ohio	43201	0	1	0	0	0	0	0	0	0	1	3	1	1
111	Access AIDS Care - The LGBT Center	1	1	1	1	2	1	http://accessaids.org/	0	1	2	0	1	1	247 West 25th Street	Norfolk	Virginia	23517	0	1	1	1	0	0	0	0	0	0	3	0	0
112	Access AIDS Care - Court One Office	0	0	0	0	2	1	http://accessaids.org/	0	1	2	0	1	1	248 West 24th Street	Norfolk	Virginia	23517	0	1	0	0	0	0	0	0	0	0	3	0	0
113	Access AIDS Care - Granby	0	0	0	0	2	1	http://accessaids.org/	0	1	2	0	1	1	3309 Granby Avenue	Norfolk	Virginia	23504	1	1	0	0	0	0	0	0	0	0	3	0	0
114	Access AIDS Care - Hampton	0	0	0	0	2	1	http://accessaids.org/	0	1	2	0	1	1	218 South Armistead Avenue	Hampton	Virginia	23669	1	1	0	0	0	0	0	0	0	0	3	0	0
115	LGBT Center of Raleigh	1	1	1	1	2	1	http://www.lgbtcenterofraleigh.com/	1	1	1	0	1	1	324 South Harrington Street	Raleigh	North Carolina	27603	0	1	0	1	0	0	0	0	0	0	3	1	1
116	LGBT Community Center of Central PA	1	1	1	1	2	1	http://www.centralpalgbtcenter.org/	1	1	1	0	1	1	1306 North 3rd Street	Harrisburg	Pennsylvania	17102	0	0	0	1	0	0	0	0	0	0	3	1	1
117	The NOW Organization	1	1	1	1	2	1	http://tlh991.wix.com/now#!	1	1	0	0	0	0	9999	Wilmington	North Carolina	9999	0	0	0	0	0	0	0	0	0	0	3	0	0
118	LGBT Detroit	1	1	1	1	2	1	http://www.lgbtdetroit.org/	1	1	1	0	1	1	41 Burroughs Street	Detroit	Michigan	48202	1	0	0	1	0	0	0	0	0	0	3	1	1
119	LGBT Visitor Center	1	1	1	1	2	1	http://www.gogaymiami.com/	1	1	1	0	1	1	1130 Washington Avenue	Miami Beach	Florida	33139	0	0	0	1	0	0	0	0	0	0	3	1	1						100 community centers
120	LGBTQ Center of Warwick Valley	1	1	1	1	2	1	http://www.gaywarwick.com/	0	1	1	0	1	2	11 Hamilton Avenue	Warwick	New York	10990	0	0	0	0	0	0	0	0	0	0	3	0	0
121	Lower Columbia Q Center	9999	9999	9999	9999	9999	0	9999	0	9999	0	0	0	0	9999	Astoria	Oregon	9999	9999	9999	9999	9999	9999	9999	9999	9999	9999	9999	3	0	0
122	Birmingham AIDS Outreach - Main Office	1	1	1	1	2	1	http://www.birminghamaidsoutreach.org/	1	1	2	0	1	1	205 32nd Street South	Birmingham	Alabama	35233	0	1	0	0	0	0	0	0	0	0	3	1	1
123	Birmingham AIDS Outreach - Magic City Acceptance Center	1	1	1	1	2	1	http://www.birminghamaidsoutreach.org/	1	1	2	0	1	1	412 37th Street South	Birmingham	Alabama	35222	1	0	1	0	0	0	0	0	0	0	3	1	1
124	Maine Pride Center Exploratory Committee	9999	9999	9999	9999	9999	0	9999	0	9999	0	0	0	0	9999	Portland	Maine	9999	9999	9999	9999	9999	9999	9999	9999	9999	9999	9999	3	0	0
125	Metro Trans Umbrella Group	0	0	0	1	2	1	www.stlmetrotrans.com	1	1	1	0	1	1	438 North Skinker Boulevard	St. Louis	Missouri	63130	0	0	0	0	0	0	0	0	0	0	3	1	0
126	Motherlode Pride Center	1	1	1	1	2	1	http://www.motherlodepride.org/	0	1	1	0	1	2	10354 Argonaut Lane	Jackson	California	95642	0	0	0	0	0	0	0	0	0	0	3	0	0
127	Mississippi Gulf Coast Rainbow Center	1	1	1	1	2	1	http://gulfcoastrainbowcenter.org/	1	1	0	0	0	0	9999	Long Beach	Mississippi	9999	0	0	0	0	0	0	0	0	0	0	3	0	0
128	New Haven Pride Center	1	1	1	1	2	1	http://www.newhavenpridecenter.org/	1	1	1	0	1	1	84 Orange Street	New Haven	Connecticut	6510	0	0	0	1	0	0	0	0	0	0	3	1	1
129	Newark LGBT Community Center	1	1	1	1	2	1	http://newarklgbtqcenter.org/	1	1	1	0	1	1	11 Halsey Street	Newark	New Jersey	7102	0	0	0	0	0	0	0	0	0	0	3	1	0
130	Nooga Diversity Center	1	1	1	1	2	1	http://noogadiversitycenter.org/	1	1	0	0	0	0	9999	Chattanooga	Tennessee	9999	0	0	0	0	0	0	0	0	0	0	3	0	0
131	North Star LGBT Community Center	1	1	1	1	2	1	http://www.northstarlgbtcc.com/	1	1	1	0	1	1	930 Burke Street	Winston-Salem	North Carolina	27101	0	1	0	1	0	0	0	0	0	0	3	1	1
132	Ogden Youth Resource Center	1	1	1	1	2	1	http://www.outreachresourcecenters.org/	1	1	2	0	1	1	2760 Adams Avenue	Ogen	Utah	84403	0	0	0	1	0	0	0	0	0	1	3	1	1
133	Brigham Youth Resource Center	1	1	1	1	2	1	http://www.outreachresourcecenters.org/	1	1	2	0	1	1	435 East 700 South	Brigham City	Utah	84302	0	0	0	1	0	0	0	0	0	1	3	1	1
134	Clearfield Youth Resource Center	1	1	1	1	2	1	http://www.outreachresourcecenters.org/	1	1	2	0	1	1	782 East 700 South	Clearfield	Utah	84015	0	0	0	1	0	0	0	0	0	1	3	1	1
135	Cache Youth Resource Center	1	1	1	1	2	1	http://www.outreachresourcecenters.org/	1	1	2	0	1	1	596 East 900 North	Logan	Utah	84321	0	0	0	1	0	0	0	0	0	1	3	1	1
136	One-n-Ten	1	1	1	1	2	1	http://onenten.org/	1	1	1	0	1	1	2660 North 3rd Street	Phoenix	Arizona	85012	0	0	0	0	0	0	0	0	0	1	3	1	0
137	ONE Treasure Coast	1	1	1	1	2	1	http://www.prideofthetreasurecoast.org/one/	0	1	0	0	0	0	9999	Port St. Lucie	Florida	9999	0	0	0	0	0	0	0	0	0	0	3	0	0
138	Out Boulder	1	1	1	1	2	1	http://www.outboulder.org/	1	1	1	0	1	1	2132 14th Street	Boulder	Colorado	80302	0	0	0	0	0	0	0	0	0	0	3	1	0
139	OutCentral	1	1	1	1	2	1	http://www.outcentral.org/	1	1	1	0	1	1	1709 Church Street	Nashville	Tennessee	37203	0	0	0	0	0	0	0	0	0	0	3	1	0
140	OutLinc	1	1	1	1	2	1	http://outlinc.org/	1	1	0	0	0	0	9999	Lincoln	Nebraska	9999	0	0	0	0	0	0	0	0	0	0	3	0	0
141	Outreach LGBT Community Center	1	1	1	1	2	1	http://www.lgbtoutreach.org/	1	1	1	0	1	1	600 Williamson Street	Madison	Wisconsin	53703	0	0	0	1	0	0	0	0	0	0	3	1	1
142	Outright Youth of Catawba	1	1	1	1	2	1	http://www.outrightyouthcv.org/joomla/	1	1	0	0	0	0	9999	Hickory	North Carolina	9999	1	0	0	0	0	0	0	0	0	1	3	0	1
143	Pasadena Pride Center	1	1	1	1	2	1	http://www.pridepasadena.org/	1	1	1	0	1	1	1443 East Washington Boulevard	Pasadena	California	91104	0	0	0	0	0	0	0	0	0	0	3	1	0
144	The Phoenix Center	1	1	1	1	2	1	http://www.phoenixcenterspringfield.org/	1	1	1	0	1	1	109 East Lawrence Avenue	Springfield	Illinois	62704	0	1	0	0	0	0	0	0	0	0	3	1	1
145	Phoenix Pride LGBT Center	1	1	1	1	2	1	http://phoenixpridelgbtcenter.org/	1	1	1	0	1	1	801 North 2nd Avenue	Phoenix	Arizona	85003	0	1	0	0	0	0	0	0	0	0	3	1	1
146	Pride Center of the Blue Ridge	1	1	1	1	2	1	http://blueridgepride.org/	1	1	0	0	0	0	9999	Ashville	North Carolina	9999	0	0	0	0	0	0	0	0	0	0	3	0	0
147	Pride Center San Antonio	1	1	1	1	2	1	http://pridecentersa.org/	1	1	1	0	1	1	147 East Mistletoe Avenue	San Antonio	Texas	78212	0	0	0	0	0	0	0	0	0	0	3	1	0
148	Pridelines	1	1	1	1	2	1	http://www.pridelines.org/	1	1	1	0	1	1	9526 Northeast 2 Avenue	Miami Shores	Florida	33138	0	1	0	1	0	0	0	0	0	1	3	1	1
149	Prism Youth Initiative	1	1	1	1	2	1	http://www.prismyouth.org/	1	1	1	0	1	1	501 5th Street East	Bradenton	Florida	34208	1	0	1	0	0	0	0	0	0	1	3	1	1
150	Q Spot	1	1	1	1	2	1	http://qspot.org/	1	1	1	0	1	1	66 South Main Street	Ocean Grove	New Jersey	7756	0	0	1	1	0	0	0	0	0	0	3	1	1
151	Queens Pride House	1	1	1	1	2	1	http://www.queenspridehouse.org/wordpress/	1	1	2	0	1	1	76-11 37th Avenue	Jackson Heights	New York	11372	0	1	0	1	0	0	0	0	0	0	3	1	1						100 CHCs
152	HAF, Inc	1	1	1	1	2	1	hafnyc.org	1	1	2	0	1	1	1767 Park Avenue	New York	New York	10035	1	1	1	1	0	1	0	0	0	0	3	1	1
153	Latino Pride House	1	1	1	1	2	1	hafnyc.org	1	1	2	0	1	1	975 Kelly Street	Bronx	New York	11459	1	1	1	1	0	1	0	0	0	0	3	1	1
154	Forge, Inc	0	0	0	1	0	1	https://forge-forward.org/	1	1	2	0	0	0	9999	9999	9999	9999	0	0	0	0	0	0	0	0	0	0	3	0	0
155	RAD Remedy	1	1	1	1	0	1	https://radremedy.org/	1	1	2	0	0	0	9999	Chicago	Illinois	9999	1	0	0	0	0	0	0	0	0	0	3	0	1
156	Rainbow Community Center of Contra Costa County	1	1	1	1	2	1	http://www.rainbowcc.org/	1	1	1	0	1	1	2118 Willow Pass Road	Concord	California	94520	1	1	1	1	0	0	0	0	0	0	3	1	1
157	Roanake Diversity Center	1	1	1	1	2	1	http://www.roanokediversitycenter.com/	1	1	1	0	1	1	806 Jamison Avenue Southeast	Roanake	Virginia	24013	1	0	1	1	0	0	0	0	0	0	3	1	1
158	VCS, Inc. - Rockland County Pride	1	1	1	1	2	1	http://www.gaypriderockland.org/	1	1	1	1	1	1	77 South Main Street	New City	New York	10956	0	0	0	0	0	0	0	0	0	0	3	1	0
159	ROSMY	1	1	1	1	2	1	http://rosmy.org/	1	1	1	0	1	1	2311 Westwood Avenue	Richmond	Virginia	23230	0	0	0	1	0	0	0	0	0	1	3	1	1
160	Sacramento Gay & Lesbian Center	1	1	1	1	2	1	http://saccenter.org/	1	1	1	0	1	1	1927 L Street	Sacramento	California	95811	0	1	0	1	0	0	0	0	0	0	3	1	1
161	San Francisco LGBT Community Center	1	1	1	1	2	1	http://www.sfcenter.org/	1	1	1	0	1	1	1800 Market Street	San Francisco	California	94102	0	0	0	0	0	0	0	0	0	0	3	1	0
162	Spectrum Center for Lesbian, Gay, Bisexual, & Transgender Concerns/Spahr Center	1	1	1	1	2	1	http://www.spectrumlgbtcenter.org/	1	1	1	1	1	1	910 Irwin Street	San Rafael	California	94901	0	0	0	1	0	0	0	0	0	0	3	1	1
163	Stonewall Columbus, Inc. aka Stonewall Columbus Center on High	1	1	1	1	2	1	http://www.stonewallcolumbus.org/	1	1	1	0	1	1	1160 North High Street	Columbus	Ohio	43201	0	1	1	1	0	0	0	0	0	0	3	1	1
164	The Center of Wichita	1	1	1	1	2	1	http://www.thecenterofwichita.org/	1	1	1	0	1	2	800 North Market	Wichita	Kansas	67214	0	0	0	0	0	0	0	0	0	0	3	1	0
165	The Center Project, Inc.	1	1	1	1	2	1	http://thecenterproject.org/	1	1	1	0	1	1	300 St. James Street	Columbia	Missouri	65201	0	0	0	0	0	0	0	0	0	0	3	1	0
166	The DC Center for the LGBT Community	1	1	1	1	2	1	http://www.thedccenter.org/	1	1	1	0	1	1	2000 14th Street Northwest	Washington	District of Columbia	20009	1	0	0	1	0	0	0	0	0	0	3	1	1
167	The Gay and Lesbian Center of the Ozarks	1	1	1	1	2	1	http://glocenter.org/	1	1	1	0	1	1	518 East Commercial Street	Springfield	Missouri	65801	1	0	0	1	0	0	0	0	0	0	3	1	1
168	The Lesbian, Gay, Bisexual, Transgender Community Center of Greater Cleveland	1	1	1	1	2	1	http://www.lgbtcleveland.org/	1	1	1	0	1	1	6600 Detroit Avenue	Cleveland	Ohio	44102	0	1	1	1	0	0	0	0	0	0	3	1	1
169	The LGBT Community Center of the Desert	1	1	1	1	2	1	http://thecenterps.org/	1	1	1	0	1	1	611 South Palm Canyon Drive	Palm Springs	California	92264	0	1	1	1	0	0	0	0	0	0	3	1	1
170	The LOFT: LGBT Community Services Center	1	1	1	1	2	1	http://loftgaycenter.org/	1	1	1	0	1	1	252 Bryant Avenue	White Planes	New York	10605	0	0	0	1	0	0	0	0	0	0	3	1	1
171	The Network	1	1	1	1	2	1	http://www.grlgbt.org/	1	1	1	0	1	1	343 Atlas Avenue Southeast	Grand Rapids	Michigan	49506	0	0	0	1	0	0	0	0	0	0	3	1	1
172	the OUTreach Center	1	1	1	1	2	1	http://www.outreachcenterav.org/	1	1	1	0	1	1	44845 Cedar Avenue	Lancaster	California	93534	0	0	0	1	0	0	0	0	0	0	3	1	1
173	The Persad Center - Pittsburgh	1	1	1	1	2	1	https://persadcenter.org/	1	1	2	0	1	1	5301 Butler Street	Pittsburgh	Pennsylvania	15201	1	1	1	1	0	0	0	0	0	0	3	1	1
174	The Persad Center - Erie	1	1	1	1	2	1	https://persadcenter.org/	1	1	2	0	1	2	1011 West 38th Street	Erie	Pennsylvania	16508	1	1	1	1	0	0	0	0	0	0	3	1	1
175	The Persad Center - Washington	1	1	1	1	2	1	https://persadcenter.org/	1	1	2	0	1	2	100 East Wheeling Street	Washington	Pennsylvania	15301	1	1	1	1	0	0	0	0	0	0	3	1	1
176	The Phillip Rush Center	1	1	1	1	2	1	http://www.rushcenteratl.org/	1	1	1	0	1	1	1530 DeKalb Avenue Northeast	Atlanta	Georgia	30307	0	0	0	0	0	0	0	0	0	0	3	1	0
177	The Pride Center of New Jersey, Inc.	1	1	1	1	1	1	http://www.pridecenter.org/	1	1	1	0	1	1	85 Raritan Avenue	Highland Park	New Jersey	8904	0	0	0	1	0	0	0	0	0	0	3	1	1
178	The South Bay Lesbian, Gay, Bisexual, & Transgender Community Organization	1	1	1	1	2	1	http://www.southbaycenter.org/	1	1	1	0	1	1	16610 Crenshaw Boulevard	Torrance	California	90504	0	0	0	0	0	0	0	0	0	0	3	1	0
179	The Spectrum Center	1	1	1	1	2	1	http://www.hattiesburgpride.com/	1	1	1	0	1	1	210 South 25th Avenue	Hattiesburg	Mississippi	39401	0	0	0	1	0	0	0	0	0	0	3	1	1
180	The UP (Uniting Pride) Center of Champaign County	1	1	1	1	2	1	http://www.unitingpride.org/	1	1	1	0	1	1	44 East Main Street	Champaign	Illinois	61820	1	1	0	0	0	0	0	0	0	0	3	1	1
181	Transgender Michigan	0	0	0	1	1	1	http://www.transgendermichigan.org/	1	1	1	0	1	1	23211 Woodward Avenue	Ferndale	Michigan	48220	0	0	0	0	0	0	0	0	0	0	3	1	0
182	Triangle Community Center	1	1	1	1	2	1	http://www.ctgay.org/	1	1	1	0	1	1	618 West Avenue	Norwalk	Connecticut	6850	0	0	0	1	0	0	0	0	0	0	3	1	1
183	Tyler Area Gays: Project TAG	1	1	1	1	2	1	https://www.tylerareagays.com/	1	1	0	0	0	0	9999	Tyler	Texas	9999	0	0	0	0	0	0	0	0	0	0	3	0	0
184	Visuality Youth Community Center	1	1	1	1	2	1	http://www.visualityflorida.com/	0	1	1	0	1	1	8359 Beacon Manor Boulevard	Fort Myers	Florida	33907	0	0	0	0	0	0	0	0	0	0	3	0	0
185	Washington County Gay Straight Alliance, Inc.	1	1	1	1	2	1	http://www.wcgsa.org/	1	1	1	0	1	1	390 Sanitarium Road	Washington	Pennsylvania	15301	0	0	0	0	0	0	0	0	0	0	3	1	0
186	Western Montana Gay & Lesbian Community Center	1	1	1	1	2	1	http://www.gaymontana.org/	1	1	1	0	1	1	127 Higgins Avenue	Missoula	Montana	59802	0	0	0	1	0	0	0	0	0	0	3	1	1
187	Westchester Jewish Community Services - Center Lane	1	1	1	1	2	1	http://www.centerlaneny.org/	1	1	1	1	1	1	20 South Broadway	Yonkers	New York	10701	0	0	1	1	0	0	0	0	0	0	3	1	1
188	Youth OUTright WNC, Inc.	1	1	1	1	2	1	http://youthoutright.org/	1	1	0	0	0	0	9999	Ashville	North Carolina	9999	0	0	0	0	0	0	0	0	0	1	3	0	0
189	Youth Pride, Inc.	1	1	1	1	2	1	http://www.youthprideri.org/	1	1	1	0	1	1	743 Westminster Street	Providence	Rhode Island	2903	0	0	1	1	0	0	0	0	0	1	3	1	1
190	The Lesbian & Gay Community Center of Charlotte	1	1	1	1	2	1	http://www.lgbtcharlotte.org/	0	0	0	0	0	0	9999	Charlotte	North Carolina	9999	0	0	0	0	0	0	0	0	0	0	3	0	0
191	The Lesbian, Gay, Bisexual, Transgender, and Questioning (LGBTQ) Community Center of the Bronx, Inc.	1	1	1	1	2	1	http://blog.bronxlgbtqcenter.org/	1	0	0	0	0	0	9999	Bronx	New York	9999	0	0	0	0	0	0	0	0	0	0	3	0	0
192	One the Move - The LGBTQ Connection	1	1	1	1	2	1	http://www.lgbtqconnection.org/	1	1	1	1	1	1	780 Lincoln Avenue	Napa	California	94558	0	0	0	0	0	0	0	0	0	1	4	1	0
193	Gay Central Valley - Merced LGBT Community Centter	1	1	1	1	2	1	http://mercedlgbtcenter.org/	1	1	2	0	1	1	1744 G Street	Merced	California	95340	0	0	0	0	0	0	0	0	0	0	4	1	0
194	Gay Central Valley - Fresno LGBT Community Center	1	1	1	1	2	1	http://www.fresnolgbtcenter.org/	1	1	2	0	1	Private	1067 North Fulton Avenue	Fresno	California	93728	0	0	0	1	0	0	0	0	0	0	4	1	1
195	Gay & Lesbian Center Bakersfield	1	1	1	1	2	1	http://www.glcenterbak.org/	1	1	1	0	1	1	902 18th Street	Bakersfield	California	93301	0	0	0	0	0	0	0	0	0	0	4	1	0
196	Joplin LGBTQ Pride Center	1	1	1	1	2	1	http://www.joplingaylesbiancenter.com/	0	0	0	1	0	0	9999	Joplin	Missouri	9999	0	0	0	0	0	0	0	0	0	0	4	0	0
197	The LGBT Community Center of St. Louis	1	1	1	1	2	1	http://www.lgbtcenterstl.org/	1	1	0	0	0	0	9999	St. Louis	Missouri	9999	0	0	0	0	0	0	0	0	0	0	4	0	0
198	Community Alliance and Action Network	1	1	1	1	2	1	http://www.caanmidwest.org/	1	1	0	0	0	0	9999	Joliet	Illinois	9999	0	0	0	1	0	0	0	0	0	0	4	0	0
199	Quad Citizans Affirming Diversity	1	1	1	1	2	1	http://www.qcadoutforgood.org/	1	1	1	0	1	1	208 18th Street	Rock Island	Illinois	61201	0	0	0	1	0	0	0	0	0	0	4	1	1
200	The Living Room	1	1	1	1	2	1	http://www.thelivingroomyouth.org/	0	1	1	0	1	1	710 6th Street	Oregon City	Oregon	97054	0	0	0	0	0	0	0	0	0	1	4	0	0
201	Pride for Youth	1	1	1	1	2	1	http://www.longislandcrisiscenter.org/pfy/index.html	1	1	1	1	1	1	2050 Bellmore Avenue	Bellmore	New York	11710	1	1	1	1	0	0	0	0	0	1	4	1	1
202	Delta Foundation of Pittsburgh	1	1	1	1	2	1	http://www.deltafoundation.us/	1	1	1	0	1	1	911 Galveston Avenue	Pittsburgh	Pennsylvania	15233	0	0	0	0	0	0	0	0	0	0	4	1	0
203	Northeastern Pennsylvania Rainbow Alliance/LGBT Center of Northeastern Pennsylvania	1	1	1	1	2	1	http://www.gaynepa.com/	1	1	0	0	0	0	9999	Pittston	Pennsylvania	9999	0	0	0	0	0	0	0	0	0	0	4	0	0
204	LGBT Center of SE Wisconsin	1	1	1	1	2	1	http://www.lgbtsewisc.org/	1	1	1	0	1	1	1456 Junction Avenue	Racine	Wisconsin	53403	0	0	0	0	0	0	0	0	0	0	4	1	0
205	Chippewa Valley LGBT	1	1	1	1	2	1	http://www.cvlgbt.info/	1	1	0	0	0	0	9999	Eau Claire	Wisconsin	9999	0	0	0	0	0	0	0	0	0	0	4	0	0
206	Diversity Richmond - Gay Community Center of Richmond	1	1	1	1	2	1	http://diversityrichmond.org/	1	1	1	0	1	1	1407 Sherwood Avenue	Richmond	Virginia	23220	0	0	0	0	0	0	0	0	0	0	4	1	0
207	7 Rivers LGBT Resource Center	1	1	1	1	2	1	http://7riverslgbtq.org/	1	1	1	0	1	1	230 Sixth Street South	La Crosse	Wisconsin	54601	0	0	0	0	0	0	0	0	0	0	4	1	0
208	7 Rivers LGBT Resource Center	1	1	1	1	2	1	http://7riverslgbtq.org/	1	1	1	0	1	2	77 East 5th Street	Winona	Wisconsin	55987	0	0	0	0	0	0	0	0	0	0	4	1	0
209	Village Vida Centre / Gay Inside Out	1	1	1	1	2	1	http://www.gaysilver.org/	0	0	0	0	0	0	9999	Bellingham	Washington	9999	9999	9999	9999	9999	9999	9999	9999	9999	9999	9999	4	0	0
210	Rainbow Village	1	1	1	1	2	1	http://www.gayinsideout.org/	0	0	0	0	0	0	9999	Silver City	New Mexico	9999	9999	9999	9999	9999	9999	9999	9999	9999	9999	9999	4	0	0
211	Our Space	1	1	1	1	2	1	http://www.baycyouth.org/	1	1	1	1	1	2	22245 Main Street	Hayward	California	94541	0	0	1	0	0	0	0	0	0	1	5	1	1
212	Pacific Pride Foundation - Santa Barbara	1	1	1	1	2	1	http://www.pacificpridefoundation.org/	1	1	2	0	1	1	126 East Haley Street	Santa Barbara	California	93101	1	1	1	1	0	0	0	0	0	0	5	1	1
213	Pacific Pride Foundation - Santa Maria	1	1	1	1	2	1	http://www.pacificpridefoundation.org/	1	1	2	0	1	1	819 West Church Street	Santa Barbara	California	93454	1	1	1	1	0	0	0	0	0	0	5	1	1
214	The Diversity Center: The Santa Cruz LGBT Community Center	1	1	1	1	2	1	http://www.diversitycenter.org/	1	1	1	0	1	1	1117 Soquel Avenue	Santa Cruz	California	95062	0	0	0	0	0	0	0	0	0	0	5	1	0
215	The Community Center, Inc.	1	1	1	1	2	1	tccidaho.org	1	1	1	0	1	1	280 North 8th Street	Boise	Idaho	83702	1	0	0	0	0	0	0	0	0	0	5	1	0
216	Battle Creek Pride	1	1	1	1	2	1	http://battlecreekpride.org/	1	1	1	0	1	1	16 East Van Buren Street	Battle Creek	Michigan	49017	0	0	0	0	0	0	0	0	0	0	5	1	1
217	Upper Delaware GLBT Center, Inc.	1	1	1	1	2	1	http://www.udglbt.org/	1	1	1	0	1	1	201 West Harford Street	Milford	Pennsylvania	18337	0	0	0	1	0	0	0	0	0	0	5	1	1
218	LGBT Qmunity Center of Montgomery County	1	1	1	1	2	1	http://www.lgbtqmunity.org/	0	1	1	0	1	1	717 West Marshall Street	Norristown	Pennsylvania	19401	0	0	0	0	0	0	0	0	0	0	5	0	0
219	The Rainbow Center	1	1	1	1	2	1	http://www.rainbowcntr.org/	1	1	1	0	1	2	2215 Pacific Avenue	Tacoma	Washington	98402	1	0	0	1	0	0	0	0	0	0	5	1	1
220	Cimarron Alliance Equality Center	1	1	1	1	2	0	9999	0	0	0	0	0	0	9999	9999	9999	9999	9999	9999	9999	9999	9999	9999	9999	9999	9999	9999	5	0	0
221	Common Ground Lima	1	1	1	1	2	0	9999	0	0	0	0	0	0	9999	9999	9999	9999	9999	9999	9999	9999	9999	9999	9999	9999	9999	9999	5	0	0
222	Harmony Café Fox Valley	1	1	1	1	2	0	9999	0	0	0	0	0	0	9999	9999	9999	9999	9999	9999	9999	9999	9999	9999	9999	9999	9999	9999	5	0	0
223	Hasbrouck Heights LGBTQ Center	1	1	1	1	2	0	9999	0	0	0	0	0	0	9999	9999	9999	9999	9999	9999	9999	9999	9999	9999	9999	9999	9999	9999	5	0	0
224	Love on a Mission LGBTQ Youth Center	1	1	1	1	2	0	9999	0	0	0	0	0	0	9999	9999	9999	9999	9999	9999	9999	9999	9999	9999	9999	9999	9999	9999	5	0	0
225	Lyon-Martin Women's Health Services	1	0	0	1	2	1	http://lyon-martin.org/	1	1	1	0	1	1	1748 Market Street	San Francisco	California	94102	1	1	1	0	0	0	0	0	1	0	2	1	1
226	Gay & Lesbian Health Collective	1	1	1	1	2	1	https://www.hglhc.org/	1	1	2	0	1	1	64 Church Street	Manchester	Connecticut	6040	1	1	1	0	0	0	0	0	0	0	2	1	1
227	Hartford Gay & Lesbian Health Collective	1	1	1	1	2	1	https://www.hglhc.org/	1	1	2	0	1	1	1841 Broad Street	Hartford	Connecticut	6114	1	1	0	1	0	0	0	0	0	0	2	1	1
228	Whitman Walker Clinic - Elizabeth Taylor Medical Center	1	1	1	1	2	1	http://www.whitman-walker.org/	1	1	2	0	1	1	1701 14th Street Northwest	Washington	District of Columbia	20009	1	1	1	1	0	0	0	0	0	0	2	1	1
229	Whitman Walker Clinic - 1525	1	1	1	1	2	1	http://www.whitman-walker.org/	1	1	2	0	1	1	1525 14th Street Northwest	Washington	District of Columbia	20005	1	1	1	1	0	0	0	0	0	0	2	1	1
230	Whitman Walker Clinic - Max Robinson Center	1	1	1	1	2	1	http://www.whitman-walker.org/	1	1	2	0	1	1	2301 Martin Luther King Jr. Avenue Southeast	Washington	District of Columbia	20020	1	1	1	1	0	0	0	0	0	0	2	1	1
231	Whitman Walker Clinic - Eastern Market	1	1	1	1	2	1	http://www.whitman-walker.org/	1	1	2	0	1	1	651 Pennsylvania Avenue	Washington	District of Columbia	20003	1	1	1	1	0	0	0	0	0	0	2	1	1
232	Feminist Women's Health Center	0	0	0	0	2	1	http://www.feministcenter.org/	1	1	1	0	1	1	1924 Cliff Valley Way	Atlanta	Georgia	30329	1	1	0	1	0	0	0	0	1	0	2	2	0
233	Howard Brown Health Center	1	1	1	1	2	1	http://www.howardbrown.org/	1	1	1	0	1	1	4025 North Sheridan Road	Chicago	Illinois	60613	1	1	1	1	0	0	0	0	0	0	2	1	1
234	Chase Brexton Health Services - Anne Arundel County Center	1	1	1	1	2	1	http://www.chasebrexton.org/	1	1	2	0	1	1	200 Hospital Drive	Gen Burnie	Maryland	21061	1	1	1	1	0	0	0	0	0	0	2	1	1
235	Chase Brexton Health Services - Columbia Center	1	1	1	1	2	1	http://www.chasebrexton.org/	1	1	2	0	1	1	5500 Knoll North Drive	Columbia	Maryland	21045	1	1	1	1	0	0	0	0	0	0	2	1	1
236	Chase Brexton Health Services - Easton Center	1	1	1	1	2	1	http://www.chasebrexton.org/	1	1	2	0	1	1	8221 Teal Drive	Easton	Maryland	21601	1	1	1	1	0	0	0	0	0	0	2	1	1
237	Chase Brexton Health Services - MICA Student Health Services	1	1	1	1	2	1	http://www.chasebrexton.org/	1	1	2	0	1	1	1300 West Mount Royal Avenue	Baltimore	Maryland	21217	1	1	1	1	0	0	0	0	0	0	2	1	1
238	Chase Brexton Health Services - Mt. Vernon Center	1	1	1	1	2	1	http://www.chasebrexton.org/	1	1	2	0	1	1	1111 North Charles Street	Baltimore	Maryland	21201	1	1	1	1	0	0	0	0	0	0	2	1	1
239	Chase Brexton Health Services - Randallstown Center	1	1	1	1	2	1	http://www.chasebrexton.org/	1	1	2	0	1	1	3510 Brenbrook Drive	Randallstown	Maryland	21133	1	1	1	1	0	0	0	0	0	0	2	1	1						148 CHCs
240	Fenway Health Ansin Building	1	1	1	1	2	1	fenwayhealth.org	1	1	2	0	1	1	340 Boylston Street	Boston	Massachusetts	2215	1	1	0	1	0	0	0	0	0	0	2	1	1
241	Fenway Health South End	1	1	1	1	2	1	fenwayhealth.org	1	1	2	0	1	1	142 Berkeley Street	Boston	Massachusetts	2116	1	1	0	0	0	0	0	0	0	0	2	1	1
242	Fenway Health Sixteen	1	1	1	1	2	1	fenwayhealth.org	1	1	2	0	1	1	16 Haviland Street	Boston	Massachusetts	2115	1	1	0	1	0	0	0	0	0	0	2	1	1
243	Fenway Health Sidney Borum Jr. Health Center	1	1	1	1	2	1	http://www.fenwayhealth.org/	1	1	2	0	1	1	75 Kneeland Street	Boston	Massachusetts	2111	1	1	1	1	0	0	0	0	0	0	2	1	1
244	Tapestry Health - HIV Client Services	1	1	1	1	2	1	http://www.tapestryhealth.org/	1	1	2	0	1	1	227 Main Street	Greenfield	Massachusetts	1301	1	1	0	0	0	0	0	0	1	1	2	1	1
245	Tapestry Health - HIV/AIDS & Prevention Services 1	1	1	1	1	2	1	http://www.tapestryhealth.org/	1	1	2	0	1	1	130 Maple Street	Springfield	Massachusetts	1103	1	1	0	0	0	0	0	0	1	1	2	1	1
246	Tapestry Health - Greenfield	1	1	1	1	2	1	http://www.tapestryhealth.org/	1	1	2	0	1	1	278 Main Street	Greenfield	Massachusetts	1301	1	0	0	0	0	0	0	0	1	1	2	1	1						200 Community Centers
247	Tapestry Health - Holyoke	1	1	1	1	2	1	http://www.tapestryhealth.org/	1	1	2	0	1	1	306 Race Street	Holyoke	Massachusetts	1040	1	0	0	0	0	0	0	0	1	1	2	1	1
248	Tapestry Health - La Voz	1	1	1	1	2	1	http://www.tapestryhealth.org/	1	1	2	0	1	1	130 Maple Street	Springfield	Massachusetts	1103	1	1	0	0	0	0	0	0	1	1	2	1	1
249	Tapestry Health - Needle Exchange	1	1	1	1	2	1	http://www.tapestryhealth.org/	1	1	2	0	1	1	15A Main Street	Holyoke	Massachusetts	1040	0	0	0	0	0	0	0	0	1	1	2	1	1
250	Tapestry Health - North Adams	1	1	1	1	2	1	http://www.tapestryhealth.org/	1	1	2	0	1	1	289 Church Street North	Adams	Massachusetts	1247	1	0	0	0	0	0	0	0	1	1	2	1	1
251	Tapestry Health - HIV/AIDS & Prevention Services 2	1	1	1	1	2	1	http://www.tapestryhealth.org/	1	1	2	0	1	1	16 Center Street	Northampton	Massachusetts	1060	1	1	0	0	0	0	0	0	1	1	2	1	1
252	Tapestry Health - Northampton	1	1	1	1	2	1	http://www.tapestryhealth.org/	1	1	2	0	1	1	16 Center Street	Northampton	Massachusetts	1060	1	1	0	0	0	0	0	0	1	1	2	1	1
253	Tapestry Health - Pittsfield	1	1	1	1	2	1	http://www.tapestryhealth.org/	1	1	2	0	1	1	100 Wendell Avenue	Pittsfield	Massachusetts	1201	1	0	0	0	0	0	0	0	1	1	2	1	1
254	Tapestry Health - Regional Offices	1	1	1	1	2	1	http://www.tapestryhealth.org/	1	1	2	0	1	1	296 Nonotuck Street	Florence	Massachusetts	1062	0	0	0	0	0	0	0	0	1	1	2	1	0
255	Tapestry Health - Springfield	1	1	1	1	2	1	http://www.tapestryhealth.org/	1	1	2	0	1	1	1985 Main Street	Springfield	Massachusetts	1103	1	0	0	0	0	0	0	0	1	1	2	1	1
256	The David Geffen Center for HIV Testing and Health Education	0	1	0	0	2	1	http://www.gmhc.org/	1	1	2	0	1	1	224 West 29th Street	New York	New York	10001	1	1	0	0	0	0	0	1	0	0	2	1	1
257	Gay Men's Health Crisis	0	1	0	0	2	1	http://www.gmhc.org/	1	1	2	0	1	1	446 West 33rd Street	New York	New York	10001	1	1	1	1	0	0	0	1	0	0	2	1	1
258	William F. Ryan Community Health Center - Upper West Side	0	0	0	0	2	1	http://www.ryancenter.org/home.htm	1	1	2	0	1	1	110 West 97th Street	New York	New York	10025	1	1	1	1	0	0	0	0	0	0	2	2	0
259	William F. Ryan Community Health Center - The Ryan Women and Children's Center	0	0	0	0	2	1	http://www.ryancenter.org/home.htm	1	1	2	0	1	1	801 Amsterdam Avenue	New York	New York	10025	1	1	1	1	0	0	0	0	1	1	2	2	0
260	William F. Ryan Community Health Center - NENA Community Health Center	0	0	0	0	2	1	http://www.ryancenter.org/home.htm	1	1	2	0	1	1	279 East Third Street	New York	New York	10009	1	1	1	1	0	0	0	0	0	0	2	2	0
261	William F. Ryan Community Health Center - Ryan/Adair Community Health Center	0	0	0	0	2	1	http://www.ryancenter.org/home.htm	1	1	2	0	1	1	565 Manhattan Avenue	New York	New York	10027	1	1	1	1	0	0	0	0	0	0	2	2	0
262	Mazzoni Center	1	1	1	1	2	1	http://mazzonicenter.org/	1	1	1	0	1	1	809 Locust Street	Philadelphia	Pennsylvania	19107	1	1	1	1	0	0	0	0	0	0	2	1	1
263	Legacy Community Health Services - Monstrose Clinic	0	0	0	0	2	1	http://legacycommunityhealth.org/Home.aspx	1	1	2	0	1	1	1415 California Street	Houston	Texas	77006	1	1	0	0	0	0	0	0	0	0	2	2	0
264	Legacy Community Health Services - Southwest Clinic	0	0	0	0	2	1	http://legacycommunityhealth.org/Home.aspx	1	1	2	0	1	1	6441 High Star Drive	Houston	Texas	77074	1	1	1	0	0	0	0	0	0	0	2	2	0
265	Legacy Community Health Services - Baker-Ripley Clinic	0	0	0	0	2	1	http://legacycommunityhealth.org/Home.aspx	1	1	2	0	1	1	6500 Rookin Street	Houston	Texas	77074	1	1	1	0	0	0	0	0	0	0	2	2	0
266	Legacy Community Health Services - Mapleridge Clinic	0	0	0	0	2	1	http://legacycommunityhealth.org/Home.aspx	1	1	2	0	1	1	6550 Mapleridge Street	Houston	Texas	77081	1	1	1	0	0	0	0	0	0	0	2	2	0
267	Legacy Community Health Services - Bissonnet Clinic	0	0	0	0	2	1	http://legacycommunityhealth.org/Home.aspx	1	1	2	0	1	1	12667 Bissonnet Street	Houston	Texas	77099	1	1	1	0	0	0	0	0	0	0	2	2	0
268	Legacy Community Health Services - Lyons Clinic	0	0	0	0	2	1	http://legacycommunityhealth.org/Home.aspx	1	1	2	0	1	1	5602 Lyons Avenue	Houston	Texas	77020	1	1	1	0	0	0	0	0	0	0	2	2	0
269	Legacy Community Health Services - Santa Clara Clinic	0	0	0	0	2	1	http://legacycommunityhealth.org/Home.aspx	1	1	2	0	1	1	5616 Lawndale Street	Houston	Texas	77023	1	1	1	0	0	0	0	0	0	0	2	2	0
270	Legacy Community Health Services - San Jacinto Clinic	0	0	0	0	2	1	http://legacycommunityhealth.org/Home.aspx	1	1	2	0	1	1	4301 Garth Road	Baytown	Texas	77521	1	1	1	0	0	0	0	0	0	0	2	2	0
271	Legacy Community Health Services - Baytown Clinic	0	0	0	0	2	1	http://legacycommunityhealth.org/Home.aspx	1	1	2	0	1	1	6730 Independence Boulevard	Baytown	Texas	77521	0	0	1	0	0	0	0	0	0	0	2	2	0
272	Legacy Community Health Services - North Street Clinic	0	0	0	0	2	1	http://legacycommunityhealth.org/Home.aspx	1	1	2	0	1	1	450 North 11th Street	Beaumont	Texas	77008	1	1	0	0	0	0	0	0	0	0	2	2	0
273	Legacy Community Health Services - Community Resource Center	0	0	0	0	2	1	http://legacycommunityhealth.org/Home.aspx	1	1	2	0	1	1	2225 Calder Avenue	Beaumont	Texas	77701	1	1	0	0	0	0	0	0	0	0	2	2	0
274	Legacy Community Health Services - South Park Clinic	0	0	0	0	2	1	http://legacycommunityhealth.org/Home.aspx	1	1	2	0	1	1	4450 Highland Avenue	Beaumont	Texas	77705	1	1	1	0	0	0	0	0	0	0	2	2	0
275	Gay Asian Pacific Alliance (GAPA)	0	1	1	0	2	1	https://www.facebook.com/GAPASF	1	1	0	0	0	0	9999	San Francisco	California	9999	0	0	0	0	0	0	1	0	0	0	6	0	0
276	Asian Pacific Islander Queer Women and Transgender Community (APIQWTC)	1	0	1	1	0	1	http://www.apiqwtc.org/	0	1	0	0	0	0	9999	Oakland	California	9999	0	0	0	0	0	0	1	0	1	0	6	0	0
277	API Equality Northern California	1	1	1	1	2	1	http://www.apiequalitync.org/	1	1	1	1	1	1	17 Walter U. Lum Place	San Francisco	California	94108	0	0	0	0	0	0	1	0	0	0	6	1	0
278	API Equality Los Angeles	1	1	1	1	2	1	http://apiequalityla.org/	1	1	1	1	1	1	1137 Wilshire Boulevard	Los Angeles	California	90017	0	0	0	0	0	0	1	0	0	0	6	1	0
279	Satrang	1	1	1	1	2	1	http://www.satrang.org/	1	1	1	0	1	1	1730 West Olympic Boulevard	Los Angeles	California	90015	0	0	0	0	0	0	1	0	0	0	6	1	0
280	Queer Asian Pacific Islander Alliance (QAPA)	1	1	1	1	2	1	http://qapa.org/	1	1	0	0	0	0	9999	Boston	Massachusetts	9999	0	0	0	0	0	0	1	0	0	0	6	0	0
281	MassEquality	1	1	1	1	1	1	www.massequality.org	1	1	1	0	1	2	14 Beacon Street	Boston	Massachusetts	2108	0	0	0	0	0	0	0	0	0	0	6	1	0
282	Massachusetts Transgender Political Coalition	0	0	0	1	1	1	http://www.masstpc.org/	1	1	1	1	1	2	14 Beacon Street	Boston	Massachusetts	2108	1	0	0	1	0	0	0	0	0	0	6	1	1
283	Q-Wave	1	0	1	1	2	1	http://www.q-wave.org/	0	1	0	1	0	0	9999	New York	New York	9999	0	0	0	0	0	0	1	0	1	0	6	0	0
284	The Network La Red	1	1	1	1	2	1	tnlr.org	1	1	0	0	0	0	9999	Boston	Massachusetts	9999	0	0	0	1	0	1	0	0	0	0	6	1	0
285	Gay Asian Pacific Islander Men of New York (GAPIMNY)	0	1	0	1	2	1	http://gapimny.org/	1	0	0	1	0	0	9999	New York	New York	9999	0	0	0	0	0	0	1	1	0	0	6	0	0
286	API Pride	1	1	1	1	2	1	http://api-pride.blogspot.com/	0	1	0	0	0	0	9999	Portland	Oregon	9999	0	0	0	0	0	0	1	0	0	0	6	0	0
287	HotPot Philly	1	1	1	1	2	1	https://hotpotphilly.wordpress.com/	0	1	0	0	0	0	9999	Philadelphia	Pennsylvania	9999	0	0	0	0	0	0	1	0	0	0	6	0	0
288	Khush DC	1	1	1	1	2	1	http://khushdc.blogspot.com/	0	1	0	0	0	0	9999	Washington	District of Columbia	9999	0	0	0	0	0	0	1	0	0	0	6	0	0
289	Salga NYC	1	1	1	1	2	1	http://www.salganyc.org/	0	0	1	0	1	2	208 West 13th Street	New York	New York	10011	0	0	0	0	0	0	1	0	0	0	6	0	0
290	Invisible to Invincible	1	1	1	1	2	1	http://www.chicagoi2i.org/	0	1	0	0	0	0	9999	Chicago	Illinois	9999	0	0	0	0	0	0	1	0	0	0	6	0	0
291	Shades of Yellow	1	1	1	1	2	1	http://www.shadesofyellow.org/	0	1	1	0	1	1	995 University Avenue West	Saint Paul	Minnesota	55104	0	0	0	0	0	0	1	0	0	0	6	0	0
292	Trikone Chicago	1	1	1	1	2	1	http://www.trikonechicago.org/	0	0	0	0	0	0	9999	Chicago	Illinois	9999	0	0	0	0	0	0	1	0	0	0	6	0	0
293	Asians and Friends Houston	1	1	0	0	2	1	http://asiansandfriends.wix.com/asians-n-friends-tx#!about2/c5i9	0	1	0	0	0	0	9999	Houston	Texas	9999	0	0	0	0	0	0	1	0	0	0	6	0	0
294	Trikone Atlanta	1	1	1	1	2	1	http://www.trikoneatlanta.org/	1	1	0	0	0	0	9999	Atlanta	Georgia	9999	0	0	0	0	0	0	1	0	0	0	6	0	0
295	South Bay Queer & Asian	1	1	1	1	2	1	http://www.sbqa.com/	0	1	1	0	1	1	938 The Alameda	Jose	California	95126	0	0	0	0	0	0	1	0	0	0	6	0	0
296	Southeast Alaska LGBTQ Alliance (SEAGLA)	1	1	1	1	2	1	http://www.seagla.org/	0	1	0	0	0	0	9999	Juneau	Alaska	9999	0	0	0	0	0	0	0	0	0	0	6	0	0
297	AGUILAS	0	1	0	0	2	1	http://sfaguilas.org/	1	1	1	0	1	1	1800 Market Street	San Francisco	California	94102	1	0	0	0	0	1	0	0	0	0	6	1	1
298	Pride Center of North Central Florida	1	1	1	1	2	1	www.pridecenterflorida.org	1	1	1	0	1	1	3131 Northwest 13th Street	Gainesville	Florida	32609	1	0	0	0	0	0	0	0	0	0	6	1	0
299	Sanctuary House of South Florida, Inc.	1	1	1	1	2	1	http://www.sanctuaryhouse.info/home.htm	0	1	1	0	1	1	116 Northwest 25th Street	Wilton Manors	Florida	33311	1	1	1	0	0	0	0	0	0	0	6	0	0
300	Georgia Equality	1	1	1	1	1	1	http://georgiaequality.org/	1	1	1	0	1	2	1530 DeKalb Avenue Northeast	Atlanta	Georgia	30307	0	0	0	0	0	0	0	0	0	0	6	1	0
301	Equality Kansas	1	1	1	1	2	1	http://eqks.org/	0	1	1	0	1	2	800 North Market	Wichita	Kansas	67214	0	0	0	0	0	0	0	0	0	0	6	0	0
302	Louisville Youth Group	1	1	1	1	2	1	http://www.louisvilleyouthgroup.com/	1	1	0	0	0	0	9999	Louisville	Indiana	9999	0	0	0	0	0	0	0	0	0	1	6	0	0
303	Cedar Rapids Gay & Lesbian Resource Center	1	1	1	1	2	1	http://www.crglrc.org/	0	0	1	0	1	1	6300 Rockwell Drive North	Cedar Rapids	Iowa	52402	0	0	0	0	0	0	0	0	0	0	6	0	0
304	Outright Lewiston-Auburn	1	1	1	1	2	1	http://www.outrightla.org/	1	1	1	1	1	2	169 Pleasant Street	Auburn	Maine	4210	0	0	0	0	0	0	0	0	0	1	6	1	0
305	Bisexual Resource Center	0	0	1	0	2	1	http://www.biresource.net/	1	1	1	0	1	1	29 Stanhope Street	Boston	Massachusetts	2116	0	0	0	1	0	0	0	0	0	0	6	1	1
306	COLAGE	1	1	1	1	0	1	www.colage.org	1	1	1	0	1	1	3815 South Othello Street	Seattle	Washington	98118	0	0	0	1	0	0	0	0	0	1	6	0	0
307	Gay & Lesbian Legal Advocates & Defenders (GLAD)	1	1	1	1	2	1	http://www.glad.org/	1	1	1	0	1	1	30 Winter Street	Boston	Massachusetts	2108	0	0	0	0	0	0	0	0	0	0	6	1	0
308	Gay Fathers of Greater Boston	0	1	0	0	2	1	http://www.gayfathersboston.org/index.shtml	0	1	0	0	0	0	9999	Boston	Massachusetts	9999	0	0	0	0	0	0	0	0	0	0	6	0	0
309	OutFront Minnesota	1	1	1	1	2	1	http://www.outfront.org/home	1	1	1	0	1	1	310 East 38th Street	Minneapolis	Minnesota	55409	0	0	0	0	0	0	0	0	0	0	6	1	0
310	Pride Collective and Community Center	1	1	1	1	2	1	http://www.pridecollective.com/	1	1	1	0	1	1	1105 First Avenue South	Fargo	North Dakota	58103	0	0	0	0	0	0	0	0	0	0	6	1	0
311	Equality North Carolina	1	1	1	1	2	1	equalitync.org	1	1	0	0	0	0	9999	Raleigh	North Carolina	9999	0	0	0	0	0	0	0	0	0	0	6	0	0
312	Audre Lorde Project - Manhattan	1	1	1	1	2	1	http://alp.org/	1	1	2	0	1	1	147 West 24th Street	New York	New York	10011	0	0	0	0	1	1	1	0	0	0	6	1	0
313	Audre Lorde Project - Brooklyn	1	1	1	1	2	1	http://alp.org/	1	1	2	0	1	1	85 South Oxford Street	Brooklyn	New York	11217	0	0	0	0	1	1	1	0	0	0	6	1	0
314	Santa Fe Human Rights Alliance	1	1	1	1	2	1	http://www.santafehra.org/	1	1	0	0	0	0	9999	Santa Fe	New Mexico	9999	0	0	0	0	0	0	0	0	0	0	6	0	0
315	Seacoast Outright	1	1	1	1	2	1	http://www.seacoastoutright.org/	1	1	1	0	1	1	206 Court Street	Portsmouth	New Hamshire	3801	0	0	0	0	0	0	0	0	0	1	6	1	0
316	The Pride Center of Cincinnati	1	1	1	1	2	1	http://www.cincyglbt.com/	1	1	0	0	0	0	9999	Cincinnati	Ohio	9999	0	0	0	0	0	0	0	0	0	0	6	0	0
317	Dayton LGBT Center	1	1	1	1	2	1	http://daytonlgbtcenter.org/	1	1	0	0	0	0	9999	Dayton	Ohio	9999	0	0	0	0	0	0	0	0	0	0	6	0	0
318	The Sexual and Gender Minority Youth Resource Center	1	1	1	1	2	1	http://www.smyrc.org/	1	1	1	0	1	1	1220 Southwest Columbia	Portland	Oregon	97201	0	0	1	0	0	0	0	0	0	1	6	1	1
319	Rhode Island LGBTQ Center	1	1	1	1	1	1	http://www.rilgbtqcenter.org/	1	1	1	0	1	1	1005 Main Street	Pawtucket	Rhode Island	2860	0	1	0	0	0	0	0	0	0	0	6	1	1
320	ALLGO	1	1	1	1	1	1	http://allgo.org/	1	1	1	0	1	1	701 Tillery Street	Austin	Texas	78702	0	1	0	0	1	1	1	0	0	0	6	1	1
321	Out Youth	1	1	1	1	2	1	http://www.outyouth.org/	1	1	1	0	1	1	909 East 49th 1/2 Street	Austin	Texas	78751	1	1	1	0	0	0	0	0	0	1	6	1	1
322	Soulforce	1	1	1	1	2	1	http://www.soulforce.org/	1	1	0	0	0	0	9999	Abilene	Texas	9999	0	0	0	0	1	1	1	0	0	0	6	0	0
323	Entre Hermanos	1	1	1	1	2	1	http://entrehermanos.org/	1	1	1	0	1	1	1105 23rd Avenue	Seattle	Washington	98122	1	1	0	1	0	1	0	0	0	0	6	1	1
324	Wyoming Equality	1	1	1	1	1	1	http://www.wyomingequality.org/	1	1	1	0	1	1	2614 Pioneer Avenue	Cheyenne	Wyoming	82001	0	0	0	0	0	0	0	0	0	0	6	1	0
325	The Wall Las Memorias Project	1	1	1	1	2	1	http://www.thewalllasmemorias.org/	1	1	1	0	1	1	5619 Monte Vista Street	Los Angeles	California	90042	0	1	0	1	0	1	0	0	0	0	6	1	0
326	Ali Forney Center	1	1	1	1	2	1	http://www.aliforneycenter.org/	1	1	1	0	1	1	224 West 35th Street	New York	New York	10001	1	1	1	1	0	0	0	0	0	0	6	1	1
327	Asian and Pacific Islander Coalition on HIV/AIDS (APICHA)	1	1	1	1	2	1	https://apicha.org/	1	1	1	0	1	1	400 Broadway	New York	New York	10013	1	1	1	0	0	0	1	0	0	0	6	1	1
328	SAGE USA	1	1	1	1	0	1	http://www.sageusa.org	1	1	2	0	1	1	305 7th Avenue	New York	New York	10001	1	1	1	1	0	0	0	0	0	2	6	0	0
329	The Trevor Project	1	1	1	1	0	1	http://www.thetrevorproject.org/	1	1	2	0	1	1	9999	9999	9999	9999	0	0	1	0	0	0	0	0	0	0	6	0	0
330	Trans Lifeline	0	0	0	1	0	1	http://www.translifeline.org/	1	1	0	0	0	0	9999	9999	9999	9999	0	0	1	0	0	0	0	0	0	0	6	0	0
331	PFLAG	1	1	1	1	0	1	community.pflag.org/	1	1	2	0	1	1	1828 L Street, Northwest	Washington	District of Columbia	20036	0	0	0	0	0	0	0	0	0	0	6	0	0
332	GLSEN	1	1	1	1	0	1	http://www.glsen.org/	1	1	2	0	1	1	25 Flatbush Avenue	Brooklyn	New York	11217	0	0	0	0	0	0	0	0	0	0	6	0	0
333	New York City Anti-Violence Project	1	1	1	1	2	1	http://www.avp.org/	1	1	1	0	1	1	116 Nassau Street	New York	New York	10038	0	0	1	0	0	0	0	0	0	0	6	1	1
334	FIERCE	1	1	1	1	2	1	http://www.fiercenyc.org/	1	1	1	0	1	1	147 West 24th Street	New York	New York	10011	0	0	0	0	1	1	1	0	0	1	6	1	0
335	The Dandilion Project	1	1	1	1	2	1	http://www.thedandelionproject.org/	0	0	0	0	0	0	9999	9999	Mississippi	9999	0	0	0	0	0	0	0	0	0	0	6	0	0
336	Santa Barbara Transgender Advocacy Network	1	1	1	1	2	1	http://www.sbtan.org/	0	1	0	0	0	0	9999	Santa Barbara	California	9999	0	0	0	0	0	0	0	0	0	0	6	0	0
337	GLAAD	1	1	1	1	0	1	http://www.glaad.org/	1	1	0	0	0	0	9999	9999	9999	9999	0	0	0	0	0	0	0	0	0	0	6	0	0
338	GSA	1	1	1	1	0	1	gsanetwork.org	1	1	2	0	1	1	1611 Telegraph Avenue	Oakland	California	94612	0	0	0	0	0	0	0	0	0	1	6	0	0
339	Open Arms Youth Project	1	1	1	1	2	1	http://www.openarmsproject.org/	1	1	1	0	1	1	2015-B South Lakewood Avenue	Tulsa	Oklahoma	74112	0	1	0	0	0	0	0	0	0	1	6	1	1
340	OUT & Loud Youth	1	1	1	1	2	1	http://www.yst.org/yst/LGBTQ_Support_Group.asp?SnID=378561801	1	1	1	0	1	1	311 South Madison Avenue	Tulsa	Oklahoma	74120	0	0	1	0	0	0	0	0	0	1	6	1	1
341	Tulsa Uniform & Leather Seekers Association	0	0	0	0	2	1	http://www.tulsaleather.com/	1	1	0	0	0	0	9999	Tulsa	Oklahoma	9999	0	0	0	0	0	0	0	0	0	0	6	0	0
342	Tulsa Area Prime Timers	0	1	1	0	2	1	http://www.tulsaareaprimetimers.com/	0	1	0	0	0	0	9999	Tulsa	Oklahoma	9999	0	0	0	0	0	0	0	1	0	2	6	0	0
343	Tulsa Lesbian Network	1	0	0	0	2	1	https://www.facebook.com/TulsaLesNetwork	0	1	0	0	0	0	9999	Tulsa	Oklahoma	9999	0	0	0	0	0	0	0	0	1	0	6	0	0
344	Imperial Court of All Oklahoma, Inc.	1	1	1	1	2	1	http://www.impcourtok.webs.com/	1	1	0	0	0	0	9999	9999	Oklahoma	9999	0	0	0	0	0	0	0	0	0	0	6	0	0
345	Tulsa Two-Spirit Association	1	1	1	1	2	1	https://www.facebook.com/Tulsa-Two-Spirit-Society-164444053595892/timeline	0	0	0	0	0	0	9999	Tulsa	Oklahoma	9999	9999	9999	9999	9999	9999	9999	9999	9999	9999	9999	6	0	0
346	Gay Men of African Descent	0	1	0	0	2	1	http://gmad.org/	1	1	1	0	1	1	540 Atlantic Avenue	Brooklyn	New York	11217	1	1	1	1	1	0	0	1	0	0	6	1	1
347	Hetrick-Martin Institute - New Jersey	1	1	1	1	2	1	http://www.hmi.org/	1	1	1	0	1	1	301 West Kinney Street	Newark	New Jersey	7103	1	1	1	1	0	0	0	0	0	1	6	1	1
348	Hetrick-Martin Institute	1	1	1	1	2	1	http://www.hmi.org/	1	1	1	0	1	1	2 Astor Place	New York	New York	10003	1	1	1	1	0	0	0	0	0	1	6	1	1
349	It Gets Better Project	1	1	1	1	2	1	http://www.itgetsbetter.org/	1	1	0	0	0	0	9999	Los Angeles	California	9999	0	0	0	1	0	0	0	0	0	1	6	0	0
350	Friends for Life	1	1	1	1	2	1	http://www.friendsforlifecorp.org/	1	1	1	0	1	1	43 North Cleveland	Memphis	Tennessee	38104	1	1	1	1	0	0	0	0	0	0	6	1	1
351	Midsouth Pride	1	1	1	1	2	1	https://midsouthpride.wordpress.com/	0	1	1	0	1	1	111 South Highland	Memphis	Tennessee	38111	0	0	0	0	0	0	0	0	0	0	6	0	0
352	Tennessee Equality Project	1	1	1	1	2	1	http://tnep.nationbuilder.com/	1	1	0	0	0	0	9999	9999	Tennessee	9999	0	0	0	0	0	0	0	0	0	0	6	0	0
353	Montana Gay Men's Task Force	0	1	0	0	1	1	http://www.mtgayhealth.org/	0	1	0	0	0	0	9999	9999	Montana	9999	1	1	0	1	0	0	0	1	0	0	6	0	0
354	Equal Rights Washington	1	1	1	1	1	1	http://www.equalrightswashington.org/	1	1	0	0	0	0	9999	Seattle	Washington	9999	0	0	0	0	0	0	0	0	0	0	6	0	0
355	Gender Diversity	1	1	1	1	2	1	http://www.genderodyssey.org/	1	1	1	0	1	1	6523 California Avenue Southwest	Seattle	Washington	98136	0	0	0	0	0	0	0	0	0	0	6	1	0
356	Ingersoll Gender Center	0	0	0	1	2	1	http://ingersollgendercenter.org/	1	1	1	0	1	1	517 East Pike Street	Seattle	Washington	98122	0	0	0	0	0	0	0	0	0	0	6	1	0
357	The Inland Northwest LGBT Center	1	1	1	1	2	1	http://www.thelgbtcenter.org/	1	0	0	0	0	0	9999	9999	9999	9999	0	0	0	0	0	0	0	0	0	0	6	0	0
358	Odyssey Youth Center	1	1	1	1	2	1	http://www.odysseyyouth.org/	1	1	1	0	1	1	1121 South Perry Street	Spokane	Washington	99202	0	0	0	1	0	0	0	0	0	1	6	1	1
359	Pride Foundation	1	1	1	1	2	1	http://www.pridefoundation.org/	1	1	1	0	1	1	2014 East Madison Street	Seattle	Washington	98122	0	0	0	0	0	0	0	0	0	0	6	1	0
360	Quest Youth Center	1	1	1	1	2	1	http://questyouthcenter.org/	1	1	1	0	1	1	1609 West 10th Avenue	Kennewick	Washington	99336	0	0	1	0	0	0	0	0	0	1	6	1	1
361	Back Country Bettys	1	0	0	0	2	1	https://sites.google.com/site/backcountrybettysnoco/	0	1	0	0	0	0	9999	Fort Collins	Colorado	9999	0	0	0	0	0	0	0	0	1	0	6	0	0
362	Equality Virginia	1	1	1	1	1	1	http://www.equalityvirginia.org/	1	1	0	0	0	0	9999	Richmond	Virginia	9999	0	0	0	0	0	0	0	0	0	0	6	0	0
363	Hampton Roads Pride	1	1	1	1	2	1	http://www.hamptonroadspride.org/	1	1	1	0	1	1	9999	Norfolk	Virginia	9999	0	0	0	0	0	0	0	0	0	0	6	0	0
364	Northern Virginia Pride	1	1	1	1	2	1	http://www.novapride.org/	1	1	1	0	1	1	7918 Jones Branch Drive	McLean	Virginia	22102	0	0	0	0	0	0	0	0	0	0	6	1	0
365	Equalize	1	1	1	1	2	1	http://equalizeit.com/	1	1	0	0	0	0	9999	Portland	Oregon	9999	0	0	0	0	0	0	0	0	0	0	6	0	0
366	Pride Winston Salem	1	1	1	1	2	1	http://www.pridews.org/	1	1	0	0	0	0	9999	Winston-Salem	North Carolina	9999	0	0	0	0	0	0	0	0	0	0	6	0	0
367	Adam Foundation	1	1	1	1	2	1	http://adamfoundation.org/	1	1	0	0	0	0	9999	Winston-Salem	North Carolina	9999	0	0	0	0	0	0	0	0	0	0	6	0	0
368	Equality Winston Salem	1	1	1	1	2	1	http://equalitywinstonsalem.org/	0	1	0	0	0	0	9999	Winston-Salem	North Carolina	9999	0	0	0	0	0	0	0	0	0	0	6	0	0
369	Lambda Phoenix Center	1	1	1	1	2	1	http://phoenixpridelgbtcenter.org/lambda-phoenix-center/	1	1	1	0	1	1	2622 North 16th Street	Phoenix	Arizona	85016	0	1	0	0	0	0	0	0	0	0	6	1	1
370	Room for All, Inc.	1	1	1	1	2	1	http://www.roomforall.com/	1	1	0	0	0	0	9999	Albany	New York	9999	0	0	0	0	0	0	0	0	0	0	6	0	0
371	GLBT of Hunterdon County, New Jersey	1	1	1	1	2	1	https://www.glbtofhunterdoncountyofnj.com/	1	1	1	0	1	2	65 Halsted Street	Clinton	New Jersey	8809	0	0	0	0	0	0	0	0	0	0	6	1	0
372	Des Moines Pride Center	1	1	1	1	2	1	http://www.lgbt-dsm.org/	1	1	1	0	1	1	1620 Pleasant Street	Des Moines	Iowa	50314	0	0	0	0	0	0	0	0	0	0	6	1	0
373	Wichita Two-Spirit Society	1	1	1	1	2	1	http://www.ict2ss.com/	1	1	1	0	1	2	650 North Seneca Street	Wichita	Kansas	67203	0	0	0	0	0	1	0	0	0	0	6	1	0
374	Gays in Faith Together	1	1	1	1	2	1	http://www.gaysinfaithtogether.org/	1	1	1	0	1	1	207 East Fulton	Grand Rapids	Michigan	49503	0	0	0	0	0	0	0	0	0	0	6	1	0
375	Pride St. Louis	1	1	1	1	2	1	http://www.pridestl.org/	1	1	1	0	1	1	3738 Chouteau	St. Louis	Missouri	63110	0	0	0	0	0	0	0	0	0	0	6	1	0
376	LGBT of Walworth County	1	1	1	1	2	1	http://www.lgbtwalco.org/	1	1	1	0	1	1	672 West Main	Lake Geneva	Wisconsin	53147	0	0	0	0	0	0	0	0	0	0	6	1	0
377	Equality Alabama	1	1	1	1	2	1	http://www.equalityalabama.org/	1	1	0	0	0	0	9999	Birmingham	Alabama	9999	0	0	0	0	0	0	0	0	0	0	6	0	0
378	Transgender Law Center	0	0	0	1	0	1	http://www.transgenderlawcenter.org/	1	1	1	0	1	1	1629 Telegraph Avenue	Oakland	California	94612	0	0	0	0	0	0	0	0	0	0	6	0	0
379	True Colors	1	1	1	1	2	1	http://www.ourtruecolors.org/	1	1	1	0	1	1	30 Arbor Street	Hartford	Connecticut	6106	0	0	0	0	0	0	0	0	0	1	6	1	0
380	Claro, Inc	1	1	1	1	2	1	http://www.claroct.org/	1	1	1	0	1	1	56 Arbor Street	Hartford	Connecticut	6106	0	0	0	0	0	1	0	0	0	0	6	1	0
381	Brother Help Thyself, Inc	1	1	1	1	2	1	http://www.brotherhelpthyself.org/	1	1	1	0	1	2	721 8th Street Southeast	Washington	District of Columbia	20003	0	0	0	0	0	0	0	0	0	0	6	1	0
382	Charlotte Pride, Inc	1	1	1	1	2	1	http://charlottepride.org/	1	1	0	0	0	0	9999	Charlotte	North Carolina	28232	0	0	0	0	0	0	0	0	0	0	6	0	0
383	The Friends of Gay Lesbian Bisexual & Transgender Youth, Inc	1	1	1	1	2	0	9999	1	9999	0	0	0	0	9999	9999	9999	9999	9999	9999	9999	9999	9999	9999	9999	9999	9999	1	6	0	0
384	LGBT Coalition of Western Massachusetts	1	1	1	1	2	1	http://www.lgbtcoalitionwma.org/	1	1	0	0	0	0	9999	Northampton	Massachusetts	1061	0	0	0	0	0	0	0	0	0	0	6	0	0
385	Gay Men's Domestic Violence Project	1	1	1	1	2	1	http://www.glbtqdvp.org/	1	1	1	0	1	1	955 Massachusetts Avenue	Cambridge	Massachusetts	2139	0	0	0	0	0	0	0	0	0	0	6	1	0
386	Keshet, Inc - San Francisco	1	1	1	1	2	1	http://www.keshetonline.org/	1	1	2	0	1	1	290 Dolores Street	San Francisco	California	94103	0	0	0	0	0	0	0	0	0	0	6	1	0
387	Keshet, Inc - Massachussets	1	1	1	1	2	1	http://www.keshetonline.org/	1	1	2	0	1	1	284 Amory Street	Jamaica Plain	Massachusetts	2130	0	0	0	0	0	0	0	0	0	0	6	1	0
388	Camp Aranutiq	0	0	0	1	0	1	http://www.harborcamps.org/	1	1	0	0	0	0	9999	Newton Lower Falls	Massachusetts	2462	0	0	0	0	0	0	0	0	0	0	6	0	0
389	Queer Women of Color Arts Project	1	0	1	1	2	1	http://www.qwocmap.org/	1	1	1	0	1	1	59 Cook Street	San Francisco	California	94118	0	0	0	0	1	1	1	0	1	0	6	1	0
390	National Queer Asian Pacific Islander Alliance, Inc	1	1	1	1	2	1	www.nqapia.org/	1	1	1	0	1	1	233 Fifth Avenue	New York	New York	10016	0	0	0	0	0	0	1	0	0	0	6	1	0
391	Gay and Lesbian Armenian Society	1	1	1	1	2	1	http://www.gayandlesbianarmenians.com/	1	1	1	0	1	1	8721 Santa Monica Boulevard	West Hollywood	California	90069	0	0	0	0	0	0	0	0	0	0	6	1	0
392	Gay Asian Pacific Support Network	0	1	1	0	2	1	http://www.gapsn.org/	1	1	0	0	0	0	9999	9999	9999	9999	0	0	0	0	0		1	1	0	0	6	0	0
393	Alaskans Together Foundation	1	1	1	1	1	1	http://www.alaskanstogether.org/	1	1	0	0	0	0	9999	Anchorage	Alaska	99529	0	0	0	0	0	0	0	0	0	0	6	0	0
394	Empowering Queer Activists and Leaders - Equal Youth Center	1	1	1	1	2	1	https://www.facebook.com/EQUALKC/timeline	1	1	0	0	0	0	9999	Kansas City	Missouri	64171	0	0	0	0	0	0	0	0	0	1	6	0	0
395	Flint Hills Human Rights Project	1	1	1	1	2	1	http://www.fhhrp.com/	1	1	0	0	0	0	9999	Manhattan	Kansas	66505	0	0	0	0	0	0	0	0	0	0	6	0	0
396	Passages	1	1	1	1	2	1	http://www.kcpassages.org/site/	1	1	1	0	1	2	620 East Armour Boulevard	Kansas City	Missouri	64109	1	0	0	0	0	0	0	0	0	1	6	1	1
397	Kansas City Bear Mafia	0	1	1	0	2	1	http://kcbearmafia.org/	1	1	0	0	0	0	9999	Kansas City	Kansas	9999	0	0	0	0	0	0	0	1	0	0	6	0	0
398	Equality Maine	1	1	1	1	1	1	http://equalitymaine.org/	1	1	1	0	1	1	550 Forest Avenue	Portland	Maine	4101	0	0	0	0	0	0	0	0	0	0	6	1	0
399	Deserve to Know	0	1	1	0	1	1	http://deservetoknowme.org/	0	1	0	0	0	0	9999	9999	Maine	9999	0	0	0	0	0	0	0	1	0	0	6	0	0
400	Coastal Women's Connection	1	0	1	0	1	1	http://www.geocities.ws/coastalwomensconnection/	0	0	0	0	0	0	9999	9999	Maine	9999	0	0	0	0	0	0	0	0	1	0	6	0	0
401	Maine TransNet	0	0	0	1	1	1	http://www.mainetransnet.org/	1	1	0	0	0	0	9999	Westbrook	Maine	9999	0	0	0	0	0	0	0	0	0	0	6	0	0
402	Trans Youth Equality	0	0	0	1	1	1	http://www.transyouthequality.org/	1	1	0	0	0	0	9999	Portland	Maine	4112	0	0	0	0	0	0	0	0	0	1	6	0	0
403	Lesbian Moms Network	1	0	0	0	2	1	http://www.lmnetwork.org/	1	1	0	0	0	0	9999	Ann Arbor	Michigan	9999	0	0	0	0	0	0	0	0	1	0	6	0	0
404	Diversity Collective Ventura County	1	1	1	1	2	1	http://www.diversitycollective.org/	1	1	0	0	0	0	9999	Ventura	California	9999	0	0	0	0	0	0	0	0	0	0	6	0	0
405	Empire State Pride Agenda Foundation	1	1	1	1	1	1	http://www.prideagenda.org/	1	1	1	0	1	1	80 Malden Lane	New York	New York	10038	0	0	0	0	0	0	0	0	0	0	6	1	0
406	Center for Black Equity	1	1	1	1	0	1	http://www.centerforblackequity.org/	1	1	1	0	1	1	1806 Vernon Street Northwest	Washington	District of Columbia	20009	0	0	0	0	1	0	0	0	0	0	6	0	0
407	Gay & Lesbian Fund of Vermont	1	1	1	1	1	1	http://www.glfundvt.org/	1	1	0	0	0	0	9999	Randolph	Vermont	5060	0	0	0	0	0	0	0	0	0	0	6	0	0
408	Sylvia Rivera Law Project	0	0	0	1	0	1	http://srlp.org/	1	1	1	0	1	1	147 West 24th Street	New York	New York	10011	0	0	0	0	1	1	1	0	0	0	6	0	0
409	Kansas City Anti-Violence Project	1	1	1	1	2	1	http://www.kcavp.org/	1	1	0	0	0	0	9999	Kansas City	Missouri	64141	0	0	1	0	0	0	0	0	0	0	6	0	0
410	Virginia Anti-Violence Project	1	1	1	1	1	1	http://virginiaavp.org/	1	1	0	0	0	0	9999	Richmond	Virginia	23221	0	0	0	0	0	0	0	0	0	0	6	0	0
411	Western New York Anti-Violence Project	1	1	1	1	2	1	http://wnyavp.org/	1	1	1	0	1	1	3105 Main Street	Buffalo	New York	14214	0	0	0	0	0	0	0	0	0	0	6	1	0
412	Matthew Shephard Foundation	1	1	1	1	0	1	http://www.matthewshepard.org/	1	1	1	0	1	1	1530 Blake Street	Denver	Colorado	80202	0	0	0	0	0	0	0	0	0	0	6	0	0
413	Gender Justice Los Angeles	0	0	0	1	2	1	http://www.gjla.org/	1	1	1	0	1	2	1730 West Olympic Boulevard	Los Angeles	California	90015	0	0	0	0	0	0	0	0	0	0	6	1	0
414	Gender Justice Nevada	0	0	0	1	1	1	http://genderjusticenv.org/	1	1	1	0	1	2	401 South Maryland Parkway	Las Vegas	Nevada	89101	0	0	1	0	0	0	0	0	0	0	6	1	1
415	Prism Center	1	1	1	1	2	1	https://www.facebook.com/RainbowCenterJxn/timeline	0	1	0	0	0	0	9999	Jackson	Mississippi	9999	0	0	0	0	0	0	0	0	0	0	6	0	0
416	Unity Mississippi	1	1	1	1	1	1	http://unityms.org/about	1	0	0	0	0	0	9999	Jackson	Mississippi	9999	0	0	0	0	0	0	0	0	0	0	6	0	0
417	Rise Above for Youth - Mike's Place	1	1	1	1	1	1	http://www.riseabove4youth.org/	1	1	0	0	0	0	9999	Clinton	Mississippi	39056	0	0	0	0	0	0	0	0	0	1	6	0	0
418	The Northwest Network of Bisexual, Trans, Lesbian & Gay Survivors of Abuse	1	1	1	1	2	1	http://www.nwnetwork.org/	1	1	0	0	0	0	9999	Seattle	Washington	98118	0	0	0	1	0	0	0	0	0	0	6	0	0
419	Equality California Institute	1	1	1	1	1	1	http://www.eqca.org/	1	1	1	0	1	1	202 West 1st Street	Los Angeles	California	90012	0	0	0	0	0	0	0	0	0	0	6	1	0
420	The Gay Christian Network	1	1	1	1	0	1	http://www.gaychristian.net/	1	1	0	0	0	0	9999	Raleigh	North Carolina	27619	0	0	0	0	0	0	0	0	0	0	6	0	0
421	Lavendar Youth Recreation and Information Center, Inc.	1	1	1	1	2	1	http://www.lyric.org/	1	1	1	0	1	1	127 Collingwood Street	San Francisco	California	94114	0	0	0	0	0	0	0	0	0	1	6	1	0
422	Equality Florida Institute, Inc.	1	1	1	1	1	1	http://eqfl.org/	1	1	0	0	0	0	9999	Saint Petersburg	Florida	33733	0	0	0	0	0	0	0	0	0	0	6	0	0
423	National Center for Equality and Innovation	1	1	1	1	0	1	http://www.nationalcei.org/	1	1	0	0	0	0	9999	Ringtown	Pennsylvania	17967	0	0	0	0	0	0	0	0	0	0	6	0	0
424	Trans Pride Initiative	0	0	0	1	0	1	http://tpride.org/	1	1	0	0	0	0	9999	Dallas	Texas	75208	0	0	0	0	0	0	0	0	0	0	6	0	0
425	Transcending Boundarires, Inc.	1	1	1	1	0	1	http://www.transcendingboundaries.org/	1	1	0	0	0	0	9999	East Berlin	Connecticut	6023	0	0	0	0	0	0	0	0	0	0	6	0	0
426	Out As I Want to Be, Inc.	1	1	1	1	2	1	http://www.outmidcoast.org/	1	1	1	0	1	1	328 Main Street	Rockland	Maine	4841	0	0	0	0	0	0	0	0	0	1	6	1	0
427	Lexington Fairness, Inc.	1	1	1	1	2	1	http://www.lexfair.org/	1	1	0	0	0	0	9999	Lexington	Kentucky	40588	0	0	0	0	0	0	0	0	0	0	6	0	0
428	Bisexual Organizing Project	0	0	1	0	2	1	http://www.bisexualorganizingproject.org/	1	1	1	0	1	2	310 East 38th Street	Minneapolis	Minnesota	55409	0	0	0	0	0	0	0	0	0	0	6	1	0
429	Gay & Lesbian Leadership Institute, Inc.	1	1	1	1	0	1	http://www.glli.org/	1	1	0	0	0	0	9999	Washington	District of Columbia	20005	0	0	0	0	0	0	0	0	0	0	6	0	0
430	Equality Federation	1	1	1	1	0	1	http://www.equalityfederation.org/	1	1	1	0	1	1	818 Southwest 3rd Avenue	Portland	Oregon	97204	0	0	0	0	0	0	0	0	0	0	6	0	0
431	Two Spirit Health Services, Inc.	1	1	1	1	2	1	http://www.twospirithealth.org/	1	1	1	0	1	1	801 Magnolia Avenue	Orlando	Florida	32802	1	1	1	0	0	0	0	0	0	0	6	1	1
432	Texas Two Spirit Society	1	1	1	1	1	1	http://texastwospirits.com/	1	1	0	0	0	0	9999	Dallas	Texas	75214	0	0	0	0	0	0	0	0	0	0	6	0	0
433	Armenian Gay & Lesbian Association of New York	1	1	1	1	1	1	http://aglany.org/	1	1	0	0	0	0	9999	Brooklyn	New York	11211	0	0	0	0	0	0	0	0	0	0	6	0	0
434	Reconciling Ministries Network	1	1	1	1	0	1	http://www.rmnetwork.org/newrmn/	1	1	1	0	1	1	123 West Madison Street	Chicago	Illinois	60602	0	0	0	0	0	0	0	0	0	0	6	0	0
435	Identity, Inc. Community Center	1	1	1	1	2	1	http://identity-inc.org/	1	1	1	0	1	1	218 West Main Street	Farmington	New Mexico	87401	0	0	0	1	0	0	0	0	0	0	6	1	1
																														306	194

## Sheet: Codebook
Variable	Definition	Codes
ServeLesbian	Whether the organization expplicitly serves lesbian women. "Gay people," "Queer" and other self-labelings of same gender loving sexualities also accepted so long as male gender pronouns are not the only specified. Not explicitly bisexual.	0=No; 1=Yes
ServeGay	Whether the organization expplicitly serves gay men. "Gay people," "Queer" and other self-labelings of same gender loving sexualities also accepted so long as female gender pronouns are not the only specified. Not explicitly bisexual.	0=No; 1=Yes
ServeBisexual	Whether the organization expplicitly serves bisexual people. "Gay people" not accepted, but "queer" and other self-labelings of same gender loving sexualities accepted so long as definition is inclusive of bisexuality.	0=No; 1=Yes
ServeTransgender	Whether the organization expplicitly serves transgender people. "Gender non-conforming," "Transexual," and other non-normative gender representations (i.e. non-cisgender) accepted.	0=No; 1=Yes
GeoCoverage	Categorization of services in terms of national, state, or local (less than state) levels.	0=National; 1=State; 2=Local
WebPresence	Whether a website describing organization and programs/activities exists.	0=No; 1=Yes
WebAddress	Link to website describing organiztion and programs/activities.	N/A (String)
NGOStatus	Registered with IRS confirmed via GuideStar, or is fiscally supported by an organization that is.	0=No; 1=Yes
InOperation	2014 Form 990 submitted and available via Guidestar; If no Guidestar data available, at least one activity organized in past year detailed on website.	0=No; 1=Yes
SiteType	Whether site listed is the only site where organization operates (Stand-Alone) or is one of multiple locations where organization operates (Multi-Site).	0=No Site; 1=Stand-Alone; 2=Multi-Site
OrgType	Whether the organization operates independent of any other organization or is dependent upon another organization for continued operation; inclusive of LGBT centers that are operated by other, non LGBT-specific organizations.	0=Independent; 1=Dependent
PhysicalSpace	Whether the organization lists an address where services can be accessed. If no address available on website, organization name entered into google maps to identify possible street address. If street address still not identifiable, organization categorized as lacking physical space.	0=No; 1=Yes
SpaceType	Whether the organization operates in a private space or shares operational space with other organizations.	0=No space; 1=Private; 2=Shared
Street Address	Street Address	N/A (String)
City	City	N/A (String)
State	State	N/A (String)
Zip	Zip Code	N/A (Numeric)
SHServiecs	Sexual health education and care services: treatment for HIV or other sexually transmitted infections (STIs); sexual health education (as prevention; for LGBT constituents, not external entities); sex education (as promotion); hormone treatment; treatment of sexual dysfunction (e.g. erectile dysfunction). Education and services must be offered on-site at least once monthly. Confirmed via website …	0=No; 1=Yes
HealthScreenings	Assessment of health issues that disproportionately impact LGBT people: HIV; breast cancer; anal cancer; hypertension; heart disease; etc. Screenings must be offered on-site by a health professional at least once monthly. Confirmed via website description of services.	0=No; 1=Yes
CTServices	Counseling and therapy offered by a mental health professional on-site at least one day (or eight hours) per month). Confirmed via website description of services.	0=No; 1=Yes
SupportServices	Peer support groups and recovery (e.g. 12-step) groups. Does not need to be lead by a health professional, but must be offered at least once monthly. Must be explicitly geared toward the support for a physical/mental health issue or social challenge, not a purely social/athletic group. Confirmed via website description of services.	0=No; 1=Yes
BlackSpecific	Organization/Site specifies an emphasis on members of the Black LGBT community. "People of color" accepted.	0=No Specification; 1=Yes
LatinoSpecific	Organization/Site specifies an emphasis on members of the Latino LGBT community. "Hispanic," "Chicano," and "people of color" also accepted.	0=No Specification; 1=Yes
APISpecific	Organization/Site specifies an emphasis on members of the Asian/Pacific Islander LGBT community. "People of color" accepted.	0=No Specification; 1=Yes
MaleSpecific	Organization/Site specifies services for men and not women.	0=No Specification; 1=Yes
FemaleSpecific	Organization/Site specifies services for women and not men.	0=No Specification; 1=Yes
GenerationSpecific	Organization/Site specifies services for a particular age group.	0=No specification; 1=Youth/Young Adults; 2=Older Adults/Elderly
Source	How organization was first identified and included in dataset	1=List of "health providing organizations" provided by CenterLink (82 listings: 74 LGBT Community Centers consisting of 52 LGBT organizations in operation); 2=Unique organizations drawn from LGBT Community Health Centers (FQHCs) listed on CDC website (51 listings: 51 LGBT Centers consisting of 13 LGBT organizations in operation); 3=Unique organizations drawn from list of 2015 CenterLink member or…
CommunityCenter	Meets following criteria: Explicitly serves L, G, B, and/or T population; has a physical space; registered non-profit w/ IRS; in operation; not national.	0=No; 1=Yes; 2=conditional yes
CommHealthCenter	Meets following criteria: Is an LGBT community center, and provides at least one LGBT health service regularly in-house	0=No; 1=Yes

## Sheet: Notes
No Longer in Operation	Excluding:
	Pierce County AIDS Foundation…include? Serves LGBT people as a result of their heightened disparity, but also serves men of color. Not necessarily LGBT focused, but HIV focused.
	Harlem United…same reason as above
	Southern Arizona AIDS Foundation
	Ohio University's LGBT Center
	ASI LGBT/Queer Resource Center
		1	Private	Calle Mayaguez #37	Hato Rey	Puerto Rico	00917	Independent	1	http://www.centrolgbttpr.org/
	National Queer Asian Pacific Islander Alliance
	List created by drawing from…
	- 62 health-providing organizations in initial email from denise spivak, which was expanded to 79 specific locations. 2 removed for being either no longer in operation or for not being based within the 50 US states.
	- Added 94 new organizations (expanded to 97 specific locations) from a list of 157 organizations attached to centerlink email from Denise Spivak (Director of member relations and external affairs) with the file name "Community Center List 2015"; 5 others from the list were identified as no longer in operation or belonging to a school/university group not accessible by the community at large.
	- Added 16 (expanded to 17 specific locations) new organizations drawn from the list of 111 respondents to the 2014 centerlink survey; 3 others from the list were identified as no longer in operation.
	- Added 8 new organizations (expanded to 9 specific locations) drawn from list of 157 centerlink member organizations on website; An additional 5 from the list were identified as no longer in operation.
	- Added 14 new organizations drawn from CDC list of 14 "LGBT Community Health Centers" (i.e. FQHCs) (expanded to 50 specific locations)
	- Added 61 new grganizations found via internet search and "resources" section of the above organizations' websites (expanded to 62 specific locations
	TOTALS:
	255 unique organizations still in operation (54 without any physical space, 260 specific locations in operation when accounting for multiple sites)
	11 organizations excluded for no longer being in operation
	4 organizations excluded for being associated with a college/university, for being a national organization, or for not being based within the 50 US states
	X LGBT community health centers?
	New Finds: Website active in some way over the past year; no larger than the state-level; no coalitions or social groups (e.g. choirs, sports teams, etc.); no exlusively pride-focused groups
